1     **Genome-wide analysis of the interplay between chromatin-associated RNA and**  
2                     **3D genome organization in human cells**

3     **Authors:** Riccardo Calandrelli <sup>1,\*</sup>, Xingzhao Wen <sup>2,\*</sup>, John Lalith Charles Richard <sup>1,#</sup>, Zhifei  
4     Luo <sup>1,#</sup>, Tri C. Nguyen <sup>1</sup>, Chien-Ju Chen <sup>2</sup>, Zhijie Qi <sup>1</sup>, Shuanghong Xue <sup>1</sup>, Weizhong Chen  
5     <sup>1</sup>, Zhangming Yan <sup>1</sup>, Weixin Wu <sup>1</sup>, Kathia Zaleta-Rivera <sup>1</sup>, Rong Hu <sup>3,4</sup>, Miao Yu <sup>4</sup>, Yuchuan  
6     Wang <sup>5</sup>, Wenbo Li <sup>6</sup>, Jian Ma <sup>5</sup>, Bing Ren <sup>3,4</sup>, Sheng Zhong <sup>1</sup>

7     <sup>1</sup> Department of Bioengineering, <sup>2</sup> Bioinformatics and Systems Biology Program, <sup>3</sup>  
8     Department of Cellular and Molecular Medicine, Center for Epigenomics, University of  
9     California San Diego, La Jolla, CA, USA

10    <sup>4</sup> Ludwig Institute for Cancer Research, La Jolla, CA, USA

11    <sup>5</sup> Computational Biology Department, School of Computer Science, Carnegie Mellon  
12    University, Pittsburgh, PA, USA

13    <sup>6</sup> Department of Biochemistry and Molecular Biology, McGovern Medical School,  
14    University of Texas Health Science Center, Houston, TX, USA

15    \*,# Equal contribution

16    Correspondence: S.Z., email: [szhong@ucsd.edu](mailto:szhong@ucsd.edu)

## 17 **Abstract**

18 The interphase genome is dynamically organized in the nucleus and decorated with  
19 chromatin-associated RNA (caRNA). It remains unclear whether the genome architecture  
20 modulates the spatial distribution of caRNA and vice versa. Here, we generate a resource  
21 of genome-wide RNA-DNA and DNA-DNA contact maps in human cells. These maps  
22 reveal the chromosomal domains demarcated by locally transcribed RNA, hereafter  
23 termed RNA-defined chromosomal domains. Further, the spreading of caRNA is  
24 constrained by the boundaries of topologically associating domains (TADs),  
25 demonstrating the role of the 3D genome structure in modulating the spatial distribution  
26 of RNA. Conversely, stopping transcription or acute depletion of RNA induces thousands  
27 of chromatin loops genome-wide. Activation or suppression of the transcription of specific  
28 genes suppresses or creates chromatin loops straddling these genes. Deletion of a  
29 specific caRNA-producing genomic sequence promotes chromatin loops that straddle the  
30 interchromosomal target sequences of this caRNA. These data suggest a feedback loop  
31 where the 3D genome modulates the spatial distribution of RNA, which in turn affects the  
32 dynamic 3D genome organization.

## 33 **Introduction**

34 The interphase genome is highly organized <sup>1</sup>. The multiscale organizational features of  
35 the genome have been characterized, including A/B compartments<sup>2</sup>, topologically  
36 associating domains (TADs)<sup>3,4</sup>, and chromatin loops<sup>5</sup>. This multiscale organization begs  
37 the question of what the functions of such an intricate architecture are. Transcriptional  
38 regulation is one of the possible functions and the most extensively studied function. In  
39 this direction, the genome architecture is shown to regulate the transcription of specific  
40 genes <sup>1,6,7</sup>, but it remains debatable whether the genome architecture has a widespread  
41 role in modulating the transcription of many genes <sup>8</sup>. Moreover, it remains unclear if the  
42 3D genome's regulatory roles are limited to transcriptional regulation. Other possible  
43 functions have rarely been tested. Here, we test another possible function, namely  
44 regulating spatial localization of chromatin-associated RNA (caRNA) <sup>9</sup>.

45 After initial debates <sup>9</sup>, caRNA has been recognized as an integral component of  
46 interphase chromosomes rather than passive degradation products <sup>10-14</sup>. Growing  
47 evidence confirms that caRNA regulates gene transcription and RNA splicing <sup>15-26</sup>. These  
48 regulatory roles often depend on caRNA's spatial localization within the nucleus <sup>20,27-30</sup>.  
49 Depending on their spatial localizations, caRNA can orchestrate the organization of  
50 nuclear bodies and compartments <sup>29-32</sup> and foster the formation of transcriptionally silent  
51 or active chromosomal domains <sup>30,33,34</sup>. However, it remains unclear how the caRNAs are  
52 spatially organized in the context of the multiscale genome architecture; whether there is  
53 any specificity in the spatial distribution of caRNAs; if there is, how is such specificity  
54 regulated; and in turn, whether the spatial localization of caRNA modulates the dynamic  
55 organization of the genome?

56 Guided by these questions, we generate high-resolution genome-wide RNA-DNA contact  
57 maps<sup>15,35-38</sup> in human cells using *in situ* Mapping of RNA-Genome Interaction  
58 (iMARGI)<sup>35,36</sup>. iMARGI captures RNA-genome associations by jointly sequencing caRNA  
59 and their associated genomic sequences with paired-end sequence reads<sup>35</sup>. iMARGI can  
60 differentiate the sequencing reads originating from RNA (iMARGI RNA-end reads) or  
61 genomic DNA (iMARGI DNA-end reads). We also use *in situ* Hi-C (Hi-C)<sup>5,39</sup> to map  
62 genome-wide chromatin interactions. These maps reveal most caRNAs are associated  
63 with the genomic sequences within several megabases of their transcription sites.

64 To dissect any causal relationships between the 3D genome organization and caRNA,  
65 we generate RNA-DNA contact maps in the genetically engineered human cells where  
66 the TAD boundaries are deleted or inserted. Comparisons of these maps reveal the ability  
67 of TAD boundaries to constrain the spreading of caRNA on the chromosomes. These  
68 data demonstrate the 3D genome's functions in regulating the spatial localization of the  
69 caRNA. Moreover, we generate RNA-DNA and DNA-DNA contact maps in human cells  
70 undergone either acute RNA depletion or deletion of a specific caRNA-producing  
71 sequence. These data reveal a suppressive role of between-anchor caRNA, i.e., the  
72 caRNA associated with the genomic region between the loop anchors, on chromatin  
73 looping. Thus, the spatial localization of the caRNA, in turn, modulates to the dynamic 3D  
74 genome organization.

## 75 **Results**

### 76 **Localized RNA-genome association and RNA-defined chromatin domains**

77 We generated iMARGI data from human embryonic stem (H1), foreskin fibroblast (HFF),  
78 and chronic myelogenous leukemia (K562) cells in duplicates (Table S1). These data  
79 revealed the relative level of any gene's RNA attached to any genomic region (target  
80 region), hereafter called the RNA attachment level (RAL) of this gene and target region,  
81 defined as the number of iMARGI read pairs with the RNA ends mapped to this gene and  
82 the DNA ends mapped to this target region<sup>35</sup>. For example, in H1 ES cells the coding  
83 gene Jumonji and AT-Rich Interaction Domain Containing 2 (JARID2) exhibited large RAL  
84 in an approximately 5 Mb region containing the JARID2 gene (Figure 1a). Additionally,  
85 the non-coding gene Pvt1 Oncogene (PVT1) exhibited large RAL in an approximately 7  
86 Mb region containing the PVT1 gene (Figure 1b). Overall, the average RAL of all the  
87 genes decreases as the genomic distance between the gene and the target region  
88 increases (Supplementary Figure S1a).

89 We represented iMARGI data as a contact matrix, where the rows represent the RNA  
90 ends of iMARGI read pairs, and the columns represent the corresponding DNA ends<sup>36</sup>  
91 (Figure 1c). A notable difference to Hi-C's symmetric contact matrix is that iMARGI's  
92 contact matrix is asymmetric. This is because RNA-DNA contacts are not necessarily  
93 reciprocal. Rectangular blocks of high-value entries emerged as a recurring pattern from  
94 iMARGI's contact matrix (Figure 1c). We identified the rectangular blocks using HOMER  
95 to call peaks on the rows of the contact matrix (row peaks), and in each row peak using  
96 HOMER to call one strongest peak in the columns (column peak). A pair of row peak and  
97 column peak defines a rectangular block. We identified 3,217, 2,019, and 2,468  
98 rectangular blocks from H1, HFF, and K562 iMARGI data (Figure 1d). All the identified  
99 rectangular blocks overlap with the diagonal entries of iMARGI's contact matrix,  
100 suggesting that they represent localized RNA-genome associations where a RNA's target  
101 regions are near the transcription site of this caRNA. Each rectangular block corresponds  
102 to a unique chromatin domain, characterized by extensive genomic association of the  
103 RNA transcribed from within this domain. Hereafter we term such domains "RNA-

104 association domains". The size of an RNA-association domain, represented by the width  
105 of a rectangular block, can reach tens of megabases (Figure 1e). In summary, RNA-  
106 association domains emerged as a main feature of the genome-wide distributions of  
107 caRNA.

### 108 **Correlation between 3D genome compartmentalization and RNA-chromatin** 109 **association**

110 The 3D genome is organized on different scales, including compartments, TADs, and  
111 chromatin loops<sup>1</sup>. We asked whether the RNA association on any genomic region  
112 correlates with this genomic region's 3D compartmentalization. To this end, we generated  
113 Hi-C data in H1, HFF, and K562 cells in duplicates and compared them with our iMARGI  
114 data (Table S1). We calculated the cumulative RAL (cRAL), the sum of the RAL of all the  
115 RNA, on every genomic region, defined as the number of iMARGI read pairs with the  
116 DNA ends mapped to this genomic region<sup>35</sup>. The A/B compartments as indicated by Hi-  
117 C contact matrix's first eigenvector (PC1)<sup>40</sup> exhibited a genome-wide correlation with  
118 cRAL (p-value < 2e-16, one way ANOVA), revealing a correlation between 3D genome  
119 compartmentalization and RNA-chromatin association.

120 We asked if the higher cRAL in the A compartment is completely attributable to a higher  
121 level of local transcription. To this end, we compared JARID2 and PVT1's RALs with A/B  
122 compartments<sup>40</sup> (PC1 track, Figure 1a, b). Both JARID2 and PVT1 exhibited small but  
123 non-zero RALs in several A compartment genomic regions that are tens of megabases  
124 away from the JARID2 and PVT1 genes (Figure 1a, b). However, the B compartment  
125 genomic regions that are closer to the JARID2 and PVT1 genes did not exhibit association  
126 of JARID2 or PVT1 RNA (Figure 1a, b), suggesting an enrichment of target regions of  
127 long-range RNA-chromatin contacts in the A compartment. Thus, the higher cRAL in the  
128 A compartment is not completely due to a higher level of local transcription.

### 129 **TAD boundaries insulate RNA-DNA contacts**

130 TADs, where DNA sequences interact with each other more frequently than with the  
131 sequences outside, are important 3D genome features that are strongly correlated with

132 transcriptional regulation<sup>3,4</sup>. We separately analyzed the RNA transcribed from within a  
133 TAD or the other regions of the same chromosome outside of this TAD. The chromatin  
134 attachment level of any RNA transcribed from within a TAD sharply decreases at the two  
135 boundaries of this TAD (p-value = 6.5e-16, Wilcoxon rank-sum test) (Figure 2a).  
136 Conversely, the attachment level of any RNA transcribed from outside of a TAD exhibits  
137 drastic changes at the TAD boundaries in the opposite direction (p-value = 2.6e-12,  
138 Wilcoxon rank-sum test) (Supplementary Figure S1b). These changes at TAD boundaries  
139 cannot be completely explained by the 1-dimensional genomic distance to the caRNA's  
140 transcription site. They suggest the possibility that a TAD boundary can insulate RNA-  
141 DNA contacts from the two sides of this boundary (cross-over RNA-DNA contacts).

142 We asked if altering the genomic sequence within a TAD boundary can affect the cross-  
143 over RNA-DNA contacts. First, we leveraged our previous finding that a CRISPR-  
144 mediated deletion of a HERV-H element (Chr13:55,578,227-55,584,087) (KO) within a  
145 TAD boundary from H9 human ES cells (WT) abolishes this TAD boundary<sup>41</sup>. We carried  
146 out iMARGI experiments on the KO and WT cells. We counted the numbers of cross-over  
147 and non-cross-over iMARGI read pairs in WT and KO. Compared to WT, KO exhibited  
148 an increased proportion in the cross-over read pairs (OR = 1.3, p-value = 0.013, Chi-  
149 square test) (Figure 2b, c, g). Thus, deleting a fraction of a TAD boundary reduced its  
150 insulation to cross-over RNA-DNA contacts.

151 Second, we previously created an insertion cell line (KI) using piggyBac transposon-  
152 mediated genomic insertion of this HERV-H sequence and identified seven insertion sites  
153 in KI<sup>41</sup> (Columns, Figure 2d). Four of the seven insertion sites exhibited small increases  
154 in insulation (unlikely-de\_novo-boundary sites), as measured by the difference in  
155 directionality index ( $\Delta_{DI} < 20$ ) (Columns 4-7, Figure 2d), whereas the other three  
156 insertion site exhibited large increases in insulation ( $\Delta_{DI} > 20$ , likely-de\_novo-  
157 boundary sites)<sup>41</sup> (Columns 1-3, Figure 2d). Only one insertion site, that has the largest  
158 increase in insulation ( $\Delta_{DI} = 66.3$ ), reached the significance level to be detected as  
159 a *de novo* TAD boundary, i.e., a boundary called in the KI Hi-C but not called in the WT  
160 Hi-C (de\_novo-boundary site) (Column 1, Figure 2d). We note the de\_novo-boundary site  
161 is one of the three likely-de\_novo-boundary sites.

162 To test any impact of any insertion site on RNA-DNA contacts, we carried out iMARGI in  
163 KI and WT cells. For every insertion site, our null hypothesis is that whether any RNA-  
164 DNA contact is a cross-over or a non-cross-over contact is independent of whether this  
165 RNA-DNA contact is detected in KI or WT. The three likely-*de\_novo*-boundary sites  
166 ( $\Delta_{DI} > 20$ ) all led to some degrees of decrease in the odds ratio (OR) of the cross-  
167 over RNA-DNA contacts in KI ( $OR < 0.90$ ), in which the decreases on two of the three  
168 likely-*de\_novo*-boundary sites were significant ( $p\text{-value} < 1.0e-4$ , Chi-square test, stars  
169 in Figure 2d). In particular, the *de\_novo*-boundary site exhibited a significant decrease in  
170 the OR of the cross-over RNA-DNA contacts in KI ( $OR = 0.75$ ,  $p\text{-value} = 3.7e-5$ , Chi-  
171 square test, Figure 2e-g). Thus, the *de novo* creation of a TAD boundary suppressed  
172 cross-over RNA-DNA contacts.

173 In contrast, none of the four unlikely-*de\_novo*-boundary sites ( $\Delta_{DI} < 20$ ) led to a  
174 detectable decrease in the OR of the cross-over RNA-DNA contacts in KI ( $OR > 0.99$ ,  $p\text{-}$   
175  $value > 0.63$ , Chi-square test, Figure 2d). Thus, inserting the same DNA sequence without  
176 sufficient subsequent changes in TAD structure did not suppress the cross-over RNA-  
177 DNA contacts. Taken together, these data show an impact of the 3D genome structure to  
178 the distribution of caRNA.

### 179 **Induction of transcription locally suppresses chromatin looping**

180 Our next question is whether RNA has an impact on the 3D structure of the genome. We  
181 approached this question in three steps. First, we depleted RPB1, the largest subunit of  
182 RNA Polymerase II (RNAP II), in HCT116 cells. RPB1 depletion resulted in increases in  
183 loop number and strengths as measured by Hi-C (Extended Text: RPB1 depletion). This  
184 result is consistent with the recent report in another cell line (DLD-1), where depletion of  
185 RPB1 led to the emergence of chromatin loops<sup>42</sup>. These data implicate the transcriptional  
186 machinery, especially the presence of RNAPII on chromatin in suppressing chromatin  
187 looping.

188 Second, we tested if the induction of the transcription of a specific gene suppresses  
189 chromatin looping. To this end, we leveraged that there is a ~55 kb loop straddling the  
190 AAVS1 locus (AAVS1 loop), and nearby, there is a non-overlapping loop with a similar

191 size to the AAVS1 loop<sup>43</sup> (Nearby Ctrl loop, Figure 3a). We applied doxycycline to  
192 engineered H1 ES cells with a dCas9-KRAB knock-in transgene at the AAVS1 locus<sup>44</sup> to  
193 induce transcription of the transgene at the AAVS1 locus (Dox+), and subsequently tested  
194 the loops with chromosome conformation capture (3C)<sup>45</sup>. Compared to without  
195 doxycycline (Dox-), Dox+ weakened the AAVS1 loop (star, Figure 3b) but had little impact  
196 on the Nearby Ctrl loop (Figure 3b). Thus, inducing the expression of a gene can suppress  
197 a chromatin loop that straddle across this gene. Taken together, the transcription of a  
198 gene can locally suppress chromatin looping. It remains unclear whether it is the  
199 transcriptional machinery, the process of transcription, or the product of transcription, i.e.,  
200 RNA, that affects chromatin looping.

### 201 **RNA has a genome-wide impact on chromatin looping**

202 We asked whether it is the transcription (including the association of the transcriptional  
203 machinery on chromatin and the process of transcription) or the RNA that impacts  
204 chromatin looping. We recognized that we could not answer this question by only testing  
205 with a specific genomic locus. This is because the answer at one genomic locus cannot  
206 necessarily rule out the alternative answer in other genomic regions. Thus, we recognized  
207 that the perhaps more important question is whether transcription or RNA has a genome-  
208 wide impact on chromatin looping. Furthermore, we recognized that if RNA impacts  
209 chromatin looping, then the transcriptional process must be implicated. However, if the  
210 transcriptional process is the cause, the causal chain does not necessarily involve RNA.  
211 With these considerations, we revised our question to whether RNA can impact chromatin  
212 looping genome-wide? To answer this question, we compared chromatin looping in  
213 control, transcription-inhibited<sup>46-48</sup>, and RNase-treated cells<sup>49</sup>. If the primary cause is the  
214 transcription process, we expect to see a widespread impact in transcription inhibition but  
215 not in acute RNase treatment. However, if transcription inhibition and acute RNase  
216 treatment lead to overlapping changes in chromatin loops genome-wide, the data would  
217 suggest RNA is involved in modulating chromatin looping. Additionally, we included  
218 another experimental condition where electrostatic molecular interactions are inhibited to  
219 test if any observed impacts are attributable to charge-driven condensates or phase  
220 separation<sup>50,51</sup>.



221 In our third step, we subjected H1 cells with ammonium acetate (NH<sub>4</sub>OAc) to disrupt  
222 electrostatic molecular interactions (the interactions due to electric charges)<sup>50-52</sup>,  
223 flavopiridol (FL) to suppress transcription elongation without displacing RNAPII from  
224 chromatin<sup>46-48 53</sup>, and acute RNase treatment to reduce RNA in the nuclei (10-minute  
225 RNase treatment before fixing the cells)<sup>49</sup> based on established protocols (NH<sub>4</sub>OAc<sup>50</sup>,  
226 FL<sup>46</sup>, RNase A<sup>49</sup>). NH<sub>4</sub>OAc disrupts molecular electrostatic interactions in living cells by  
227 providing monovalent cations without perturbing intracellular pH<sup>51</sup>. To check the expected  
228 effects of the three treatments, we immunostained nuclear speckle-associated proteins  
229 SON<sup>54</sup> and SC35<sup>55</sup> in control and each treatment. NH<sub>4</sub>OAc reduced the numbers of SON  
230 and SC35's foci (p-value = 0.001 for SON, 0.009 for SC35, Wilcoxon test) (Supplementary  
231 Figure S2a, b, e, f, i, l), consistent with the role of RNA's electrostatic interactions in  
232 maintaining nuclear speckles<sup>56</sup>. Conversely, FL made SON and SC35 foci larger and  
233 more distinct<sup>57</sup> (Supplementary Figure S2c, g, j, m). RNase A increased the numbers of  
234 SON and SC35's foci (p-value = 0.034 for SON, 0.010 for SC35, Wilcoxon test)  
235 (Supplementary Figure S2d, h, k, n), consistent with the observations that "low  
236 RNA/protein ratios promote phase separation into liquid droplets"<sup>58</sup> and condensate  
237 formation<sup>59</sup>.

238 We generated Hi-C after each treatment in duplicates (Table S1) and analyzed these data  
239 together with those of the unperturbed H1 cells (control). We called chromatin loops from  
240 our Hi-C data in each of the four conditions that have comparable sequencing depths  
241 (Table S1) using HiCCUPS<sup>60</sup>. The loop numbers were similar in control (2,473 loops) and  
242 NH<sub>4</sub>OAc (2,437 loops) (p-value = 0.55, paired t test) and were increased in FL (5,039  
243 loops) (p-value < 1.1e-8, paired t test) and RNase (4,963 loops) (p-value < 2.3e-9, paired  
244 t test) (Figure 3c). These loop number differences cannot be attributed to different  
245 sequencing depths or batch effects because the samples were prepared in the same  
246 batch and sequenced to comparable depths (600 – 650 million read pairs per condition,  
247 Table S1b). Most of the emerged loops in FL colocalized with the emerged loops in RNase  
248 (first column, Figure 3c). For example, a loop linking ATF7 and KRT18 genes that was  
249 absent in control and NH<sub>4</sub>OAc emerged in both FL and RNase (arrows, Figure 3d,  
250 Supplementary Figure S3).

251 The overall loop strength was similar in control and NH<sub>4</sub>OAc, but stronger in FL and  
252 RNase, as reflected by both Peak to Lower Left (P2LL) (Figure 3e) and Z-score Lower  
253 Left (ZscoreLL) scores<sup>5</sup> (Figure 3f). We repeated these analyses based on the union of  
254 the loops in the four conditions and quantified every loop's strength by Peak to Mean  
255 (P2M) in each condition. P2Ms were greater in FL and RNase than in control (p-value <  
256 2.2e-16, Wilcoxon test), whereas NH<sub>4</sub>OAc's P2Ms were not different from the control's  
257 (p-value = 0.41, Wilcoxon test) (Figure 3g). The consistent increases of loop strengths in  
258 FL and RNase as compared to control support our detected increases of loop numbers  
259 in FL and RNase and suggest that our conclusion of loop number increases does not  
260 depend on the threshold of loop calls. Taken together, FL and RNase both resulted in an  
261 increase of chromatin loops and these emerged loops often co-localize. As opposed to  
262 the null hypothesis that RNA does not have a genome-wide impact on chromatin looping,  
263 these data are in favor of a suppressive effect of RNA to chromatin looping genome-wide.

#### 264 **RNA's genomic target regions correlate with the suppressed chromatin loops**

265 Our next question is what RNA has an impact on which chromatin loops. Although we  
266 cannot analyze every aspect of a select RNA, we can analyze the chromatin-associated  
267 fraction of this RNA, in terms of this RNA's genomic target regions (target region) and the  
268 RNA attachment level (RAL) of this RNA on any target region. We can compare the target  
269 region with the genomic location of any chromatin loop. Thus, we asked whether the  
270 change of any caRNA, in terms of changes of target regions or RAL, correlates with the  
271 change of any chromatin loop. Answering this question can inform us which RNA could  
272 impact which chromatin loop, although we will miss those impacts that are independent  
273 of RNA-chromatin association.

274 We generated iMARGI in each treatment condition (NH<sub>4</sub>OAc, FL, RNase) in duplicates  
275 (Table S1) and analyzed these data together with those of the unperturbed H1 cells  
276 (control). As expected, FL exhibited the largest reduction of the heights of the rectangular  
277 blocks in iMARGI's contact matrix (p-value < 3e-104, Wilcoxon rank-sum test)  
278 (Supplementary Figure S4e), consistent with FL's inhibitory effect on transcription  
279 elongation<sup>47</sup>. RNase exhibited the largest reduction of caRNA domains' number (3,217 in

280 control and 357 in RNase,  $p$ -value  $< 3e-9$ , paired t test) (Supplementary Figure S4d) and  
281 sizes (widths of the rectangular blocks) ( $p$ -value  $< 5e-210$ , Wilcoxon rank-sum test)  
282 (Supplementary Figure S4f).

283 We analyzed two groups of caRNA, namely those associated with loop anchors (anchor  
284 caRNA), and those between loop anchors (between-anchor caRNA). We asked if the  
285 changes in the level of between-anchor caRNA correlates with the changes of chromatin  
286 loops across our treatment conditions. To answer this question, we analyzed the union of  
287 the loops (Union loops) detected in every condition (Control, NH4OAc, FL, RNase). These  
288 Union loops represent all possible loop locations, including those detected as loops in the  
289 Control (control loop) or in an RNA perturbation experiment (emergent loop). We used  
290 the ratio of between-anchor caRNA and anchor caRNA levels (Inside-loop To Anchor  
291 ratio (ITA ratio)) to represent the relative level of between-anchor caRNA for any Union  
292 loop.

293 First, we tested whether the detected loops in control (control loops) tend to locate at the  
294 genomic locations with a low level of between-anchor caRNA in the control. We carried  
295 out this test using Gene Set Enrichment Analysis (GSEA)<sup>61</sup>. According to GSEA's  
296 procedure, we sorted the Union Loops by increasing levels of between-anchor caRNA,  
297 i.e., increasing ITA ratios, creating a ranked list (Figure 4a). We then plotted the  
298 corresponding GSEA score at every rank (Figure 4b), where a positive/negative GSEA  
299 score indicates an enrichment/depletion of the control loops in the subset of top-ranked  
300 Union Loops. Here, top-ranked means from rank #1 to the current rank on which GSEA  
301 score is reported. The GSEA scores stayed positive in the top portion (~30%) of this rank  
302 list (Figure 4b), suggesting that the control loops are enriched in those Union loops that  
303 exhibit lower levels of between-anchor caRNA in the control condition than in the other  
304 conditions. In other words, among all the locations where loops have been detected, the  
305 control loops tend to appear at those locations where the relative level of between-anchor  
306 caRNA is low.

307 Second, RNase reduced caRNA levels in all Union loops (Figure 4c) and nearly doubled  
308 the number of detected loops as compared to Control (Figure 3c). We tested whether the

309 loops in RNase (RNase loops) appeared at the locations where the between-anchor  
310 caRNA is most rigorously depleted in RNase. To this end, we re-ordered the Union loops  
311 by increasing levels of between-anchor caRNA, i.e., the ITA ratio in RNase (Figure 4c).  
312 As expected, all the GSEA scores are positive in this analysis (Figure 4d), which is  
313 because the RNase loops comprise the majority (~75%) of the Union loops, and therefore  
314 a majority in any top ranked subset. The GSEA scores in this rank list of Union loops first  
315 increased and then decreased, which means that the RNase loops are enriched in the  
316 higher ranked subset, which are the Union loops with low levels of between-anchor  
317 caRNA in RNase. This enrichment means that the emerged loops in RNase often  
318 appeared at the genomic locations where the between-anchor caRNA is most rigorously  
319 removed by RNase. Taken together, we observed a genome-wide negative correlation  
320 between between-anchor caRNA and the chromatin loops that stride across the target  
321 region of these caRNA.

### 322 **Reducing select RNA creates specific chromatin loops**

323 We wondered if we could apply the aforementioned correlation to identify which RNA has  
324 an impact on what chromatin loops. To this end, we tested whether we could create a  
325 particular chromatin loop by reducing a specific RNA, which is the RNA that exhibits a  
326 strong level of chromatin attachment to the genomic region between the anchors of this  
327 chromatin loop. We chose the ZMYND8 RNA for this test. We chose the ZMYND8 RNA  
328 because (1) FL reduced the RAL of the ZMYND8 RNA in an approximately 90 kb genomic  
329 region (Figure 4e); (2) RNase also removed the ZMYND8 caRNA in this (and a larger)  
330 genomic region; (3) a chromatin loop straddling across this 90 kb region was detected by  
331 Hi-C in both FL and RNase (arrows, Figure 4e), hereafter called the “straddling loop”. We  
332 note that FL and RNase reduce the RALs of many RNAs, and thus from these data we  
333 cannot conclude that the emergence of this straddling loop in FL and RNase is due to the  
334 reduction of any specific RNA.

335 RNA knockdown without affecting transcription can reduce nucleoplasmic RNA and  
336 suppress long-range RNA-chromatin interactions, however, it cannot effectively remove  
337 nascent RNA that are associated with the chromatin near the transcription locus <sup>21</sup>.

338 Therefore, we do not have a method to effectively remove ZMYND8 caRNA near the  
339 ZMYND8 gene without affecting the transcription of the ZMYND8 gene. We employed  
340 two approaches to address this issue. First, we asked whether suppression of ZMYND8  
341 transcription has the same effect as RNase in creating the “straddling loop”. Second, we  
342 will describe in subsequent sections the analysis of inter-chromosomal RNA-chromatin  
343 interactions, where we can better distinguish between impacts of the RNA from the  
344 transcriptional process.

345 We suppressed ZMYND8 by CRISPR interference (CRISPRi) in an H1 ES cell line with  
346 doxycycline-inducible dCas9-KRAB<sup>44,62</sup>. Compared to scrambled gRNA control, our  
347 gRNA targeting ZMYND8’s promoter reduced ZMYND8’s transcription level to  
348 approximately 25% (Figure 4f). We designed chromosome conformation capture (3C)  
349 primers<sup>45</sup> for (1) a negative control “loop” (Negative Ctrl) that is located 200 kb upstream  
350 of the emerged loop and has approximately the same size as the emerged loop, which is  
351 not detected as a loop in any Hi-C experiment, (2) a positive control loop (Positive Ctrl)  
352 detected by Hi-C in both control and FL, which is not on the same chromosome as  
353 ZMYND8, and (3) the straddling loop (also termed the “to-be-tested loop”). We carried  
354 out 3C after treating the cells with doxycycline without supplying gRNA (gRNA:None Ctrl),  
355 supplying with a scrambled gRNA (gRNA:Scramble Ctrl), and with gRNA targeting  
356 ZMYND8’s promoter (gRNA:ZMYND8). The Negative Ctrl primers did not yield any  
357 product in any experiment (the first 3 lanes), and the Positive Ctrl primers yielded products  
358 at the expected sizes in all three experiments (the last 3 lanes, Figure 4g). In contrast,  
359 the primers for the to-be-tested loop yielded a unique product with ZMYND8 gRNA (arrow,  
360 Figure 4g), which is absent from the gRNA:None and gRNA:Scramble controls. In  
361 summary, acute reduction of RNA induced many chromatin loops including the straddling  
362 loop, and suppression of the ZMYND8 expression can re-create the emergence of the  
363 straddling loop. Thus, the negative correlation of between-anchor caRNA and chromatin  
364 loops can help to identify which RNA has an impact on which chromatin loop. We note  
365 that the CRISPRi experiment by itself cannot distinguish whether the loop was created by  
366 suppression of transcription or reduction of ZMYND8 RNA. This CRISPRi experiment  
367 demonstrates that a loop created by acute depletion of RNA (RNase) can be re-created  
368 by suppression of the expression of a specific gene.

369 **Acute RNA reduction increases the average strength of the loops with convergent**  
370 **CTCF binding sites in their loop anchors**

371 Our next question is whether an RNA can impact the chromatin loops located far from the  
372 transcription locus of this RNA (distal loops). We recognize that our previously mentioned  
373 correlation is not sufficient to connect a specific RNA to specific distal loops. This is  
374 because an RNA can associate with many distal genomic regions, often at low levels.  
375 Thus, we proceeded to identify additional correlational rule(s) to between RNA and  
376 chromatin loops.

377 Convergent CTCF binding sites (CBS) in the loop anchors is a characteristic of the loops  
378 created by loop extrusion<sup>59</sup>. We tested whether the convergent CBS are enriched in the  
379 anchors of the loops with increased loop strengths in RNase. To this end, we categorized  
380 the Union Loops (the union of the loops detected in any treatment condition) into three  
381 groups based on the orientations of the CTCF binding sites at their anchors, namely the  
382 loops with convergent CBS, non-convergent CBS, or no CBS. We used Peak to Lower  
383 Left (P2LL) to quantify the strength of each loop<sup>5</sup>. Compared to control, RNase treatment  
384 increased P2LL in the Union Loops with convergent CBS ( $p$ -value  $< 1.6E-9$ , Wilcoxon  
385 test, Figure 5a). In comparison, RNase did not increase P2LL in the Union Loops with  
386 non-convergent CBS ( $p$ -value = 0.4663, Wilcoxon test, Figure 5a) or in the loops without  
387 CBS ( $p$ -value = 0.6277, Wilcoxon test, Figure 5a). Thus, acute RNA reduction increased  
388 the average strength of those loops with convergent CBS in their loop anchors,  
389 suggesting an enrichment of convergent CBS in anchors of RNA suppressed loops. In  
390 summary, we have observed two genome-wide correlations, which are (1) a negative  
391 correlation of between-anchor caRNA and chromatin loops and (2) an enrichment of  
392 convergent CBS in RNA suppressed loops. Hereafter we call these correlations the  
393 “correlational rules”.

394 **Removal of select RNA increases the strengths of a subset of distal chromatin**  
395 **loops**

396 We wondered if we could apply the correlational rules to identify which RNA may have an  
397 impact on what distal chromatin loops. To this end, we tested whether removing specific

398 RNA can increase the strengths of certain distal loops. We chose the HERV-H RNA for  
399 this test for the following reasons. First, we identified the HERV-H caRNA-associated  
400 genomic sequences (HERV-RNA target regions) in Control and compared them with the  
401 locations of the loops emerged in RNase (RNase emergent loops). The RNase emergent  
402 loops are enriched at the locations that exhibit between-anchor HERV-H caRNA in  
403 Control (odds ratio = 1.38, p-value = 5.621e-5, Chi-square test, Figure 5b), suggesting  
404 that those loops that stride across between-anchor HERV-H caRNA are suppressed in  
405 Control. Second, we analyzed the subset of RNase emergent loops that stride across  
406 HERV-H caRNA-attached genomic sequences in Control. Hereafter, we call this subset  
407 of RNase emergent loops as “candidate HERV-H caRNA insulated loops” (CHRI-loops).  
408 CHRI-loops are enriched with convergent CBS in their loop anchors as compared to (1)  
409 control loops striding across HERV-H caRNA-attached genomic sequences (OR = 1.34,  
410 p = 0.0068, Chi-square test), and to (2) the other control loops not striding across HERV-  
411 H caRNA-attached genomic sequences (OR = 1.44, p = 5.8e-6, Chi-square test), and to  
412 (3) the RNase emergent loops not striding across any HERV-H caRNA-attached genomic  
413 sequences in Control (OR = 1.60, p = 4.1e-9, Chi-square test, Figure 5c). Thus,  
414 convergent CBS are enriched in the loop anchors of CHRI-loops.

415 We tested whether deleting an HERV-H element from the human genome can lead to  
416 increase the loop strength of any distal CHRI-loop. To this end, we re-used our  
417 Chr13:55.5MB\_HERV KO (CRISPR-mediated deletion of a HERV-H element at  
418 Chr13:55,578,227-55,584,087) human ES cells <sup>41</sup>. We identified the caRNA transcribed  
419 from this Chr13:55.5MB\_HERV element and its target genomic sequences  
420 (Chr13:55.5MB\_HERV targets) in the WT. We call the loops that stride across any  
421 Chr13:55.5MB\_HERV targets as “target-crossing loops”. We compared the loop strength  
422 changes of all target-crossing loops between Chr13:55.5MB\_HERV KO and WT based  
423 on Hi-C data. No target-crossing loop exhibited detectable decrease in loop strength in  
424 Chr13:55.5MB\_HERV KO, whereas two target-crossing loops exhibited increased loop  
425 strengths in the Chr13:55.5MB\_HERV KO (Figure 5d). Both Chr13:55.5MB\_HERV KO-  
426 induced target-crossing loops contain convergent CBS in their loop anchors (Figure 5d).  
427 Neither Chr13:55.5MB\_HERV KO-induced target-crossing loop locates on Chromosome  
428 13, where the HERV-H element is deleted (Figure 5d). Thus, removal of specific RNA

429 increased the loop strengths of a subset of chromatin loops that stride across this RNA's  
430 interchromosomal target regions and contain convergent CBS in their loop anchors.  
431 These data suggest specific RNA can modulate a subset of chromatin loops.  
432 Furthermore, the correlational rules help to identify which RNA modulates what chromatin  
433 loops.

## 434 **Discussion**

435 We presented a resource composed of genome-wide RNA-DNA and DNA-DNA contact  
436 maps in three human cell lines. The iMARGI and Hi-C experimental protocols and data  
437 processing pipelines used for generating this resource were proven by the 4D Nucleome  
438 (4DN) Consortium Omics Standards Working Group and the 4DN Steering Committee  
439 (<https://www.4dnucleome.org/protocols/>). The three human cell lines for data generation  
440 were nominated by the 4DN Joint Analysis Working Group and cultured under the 4DN  
441 Cell Working Group approved protocols (<https://www.4dnucleome.org/cell-lines/>). All the  
442 data are accessible through the 4DN Data Portal (see Data Availability and Table S1).

443 The initial challenges to caRNA as a distinct class of RNA were focused on whether these  
444 RNAs are exclusively nascent transcripts<sup>9</sup>. Such a concern was alleviated by the  
445 discoveries of long-range RNA-chromatin interactions<sup>10-14</sup>, suggesting that caRNA does  
446 not completely overlap with nascent transcripts. Our genome-wide analyses reveal two  
447 features of RNA-genome association. First, RNA is preferentially associated with its  
448 transcription site and up to several megabases of flanking genomic sequence. Second,  
449 TAD boundaries insulate RNA-DNA contacts, evidencing the impact of 3D genome on  
450 the spatial distribution of caRNA.

451 It remains unclear how RNA may affect the 3D genome. Because several 3D features of  
452 the genome can be reproduced by computational models without considering RNA<sup>64,65</sup>  
453 and *in vitro* experiments to recapitulate loop extrusion without RNA<sup>66</sup>, RNA was not  
454 expected to affect the genome's 3D organization. Furthermore, previous work found that  
455 acute reduction of RNA had subtle impacts to the 3D genome at the compartment and  
456 the TAD levels<sup>49</sup>. Our analyses led to similar findings. At the compartment level, Hi-C's  
457 PC1 in FL and RNase exhibited strong correlations with Hi-C's PC1 in control, suggesting



458 these perturbations had little impact to A/B compartments. At the TAD level, FL and  
459 RNase exhibited “highly concordant” TADs with the control, based on the “Measure of  
460 Concordance (MoC)”<sup>63</sup> (pairwise MoCs=0.93 and 0.90, well above 0.75, the threshold for  
461 being “highly concordant”<sup>63</sup>). These data confirm that the impacts of RNA to the 3D  
462 genome are subtle, at least at the scales of A/B compartments and TADs.

463 It has not been tested whether an acute reduction of RNA exerts systematic impacts to  
464 chromatin loops. Our data reveal either transcription inhibition or acute RNA reduction  
465 induced chromatin loops. Most induced loops are shared between transcription inhibition  
466 and acute RNA reduction, indicating that the impact on chromatin looping cannot be  
467 completely attributed to transcription or the presence of RNAPII on chromatin. Indeed,  
468 suppressing a specific caRNA created a chromatin loop, with the loop anchors striding  
469 across the genomic sequence associated with this caRNA (Figure 4e-g). Furthermore,  
470 deleting the genomic sequence of a caRNA (Chr13:55.5MB\_HERV) strengthened the  
471 chromatin loops on other chromosomes (Figure 5d). These inter-chromosomal effects  
472 argue against that loop strengths are modulated by the transcription of the deleted  
473 sequence. They support the idea that the caRNA at specific locations, i.e. between-  
474 anchor caRNA, suppresses chromatin looping. Of note, these experiments were not  
475 meant to establish an exclusive role of RNA in modulating chromatin looping. While these  
476 data establish RNA’s role, they do not exclude transcription or RNAPII’s role in modulating  
477 chromatin looping.

478 What remains to be addressed is whether there is any rule that links specific RNA with  
479 specific loops that this RNA can modulate. Disrupting electrostatic interactions by  
480 NH<sub>4</sub>OAc did not lead to significant changes in chromatin loops, withholding us from  
481 exploring possible rules based on charge-mediated condensates or phase separation.  
482 Instead, we investigated RNA’s target regions, because the genomic locations of the  
483 target regions can be compared with the genomic locations of loops. We found a reverse  
484 correlation of the caRNA at specific genomic locations, i.e. between loop anchors, and  
485 the loop’s strength. With this correlational rule, we hypothesized which RNA suppresses  
486 what chromatin loops. We were able to modulate the hypothesized chromatin loops by  
487 targeting the identified RNA, thus validating the identified relationships. These validations

488 suggest a general approach based on the localization of caRNA to identify the putative  
489 regulatory RNA of chromatin loops.

490 Recent work revealed a suppressive role of RNAPII's presence on chromatin to chromatin  
491 looping<sup>42</sup>. Without underestimating RNAPII's role, our experiments were designed to test  
492 if there are any effects of the RNA as well. FL treatment does not displace RNAPII from  
493 chromatin<sup>53</sup>, making the FL emergent loops unlikely due to a change of RNAPII's  
494 presence on chromatin. Furthermore, our analysis focused on the shared loops that are  
495 created by both FL or RNase treatment. These shared loops are even more unlikely  
496 attributable to the loading of RNAPII on chromatin. Our data suggest that in addition to  
497 RNAPII, RNA should be considered toward obtaining a complete picture on the interplay  
498 between transcription and genome organization.

## 499 **Acknowledgments**

500 We thank 4DN Data Coordination and Integration Center for hosting the raw and the  
501 preprocessed datasets for public access. We thank the 4DN Cell Working Group, 4DN  
502 Omics Standards Working Group, and 4DN Steering Committee for providing guidelines  
503 on experimental protocols and data processing pipelines. We thank the 4DN Joint  
504 Analysis Working Group for evaluation of all the data in this resource and cross-  
505 comparison with the other 4DN Consortium generated datasets. This work is funded by  
506 NIH grants DP1DK126138, R01GM138852, DP1HD087990, and NIH Common Fund 4D  
507 Nucleome grants UM1HG011593, UM1HG011585, U54DK107977, and U01CA200147.

## 508 **Data availability**

509 All high-throughput data supporting the current study have been deposited on the 4D  
510 Nucleome Data Portal (<https://data.4dnucleome.org>) with the following IDs. iMARGI  
511 datasets: H1 control, 4DNESNOJ7HY7; H1 NH4OAc, 4DNESGRI8A8N; H1 FL,  
512 4DNES8B3R3P8; H1 RNase, 4DNESOBRUQ12; HFF, 4DNES9Y1GHK4; K562,  
513 4DNESIKCVASO. Hi-C datasets: H1 control, 4DNESFSCP5L8; H1 NH4OAc,  
514 4DNES2253IBO; H1 FL, 4DNES65I3RQG; H1 RNase, 4DNES4AABNEZ; HFF,  
515 4DNESNMAAN97; K562, 4DNESI7DEJTM.

## 516 **Code availability**

517 The codes used for the analysis have been deposited and made publicly available on  
518 GitHub at <https://github.com/Zhong-Lab-UCSD/RNA3Dgenome-code-repository>.

## 519 **Extended Text: RBP1 depletion**

520 RBP1, encoded by the POLR2A gene, is the largest subunit of RNA polymerase II. We  
521 used the second generation of the auxin-inducible degron (AID2) technology to deplete  
522 RBP1<sup>64</sup>. In HCT116 RPB1-Dox-OsTIR1-mClover-mAID cells (RPB1-AID2 cells), where  
523 RBP1 is tagged for acute depletion upon addition of doxycycline and 5-Ph-IAA<sup>64</sup>. As the  
524 control, we treated RPB1-AID2 cells by doxycycline for 24 hours without 5-Ph-IAA and  
525 followed with Hi-C (No-depletion Ctrl), which yielded 632,233,849 read pairs. For the  
526 depletion experiment, we treated RPB1-AID2 cells by doxycycline for 24 hours and 5-Ph-  
527 IAA for 6 hours and followed with Hi-C (Depletion group), which yielded a comparable  
528 number (716,607,191) of read pairs to the IAA- Ctrl. We subjected these data loop calling  
529 with HiCCUPS<sup>60</sup>. The Depletion group yielded 3,307 loops, which is approximately 16%  
530 more than the detected loops in No-deletion Ctrl (2,619) (p-value = 7.9e-9, paired t-test,  
531 chromosome by chromosome). These data suggest depletion of RBP1 led to an increase  
532 in loop number.

533 Taking the union of the loops in the No-depletion Ctrl and the Depletion group, we  
534 obtained a total of 5,241 loops (Union loops). We compared the loop strengths (P2LL)<sup>5</sup>  
535 between the No-depletion Ctrl and the Depletion group using all the Union loops. The  
536 Depletion group exhibited higher P2LLs than the No-depletion Ctrl (fold change = 1.06,  
537 p-value < 2.07e-14, paired t-test), suggesting an increase in loop strengths. Taken  
538 together, acute depletion of RBP1 resulted in more and stronger chromatin looping.

## 539 **References**

- 540 1 Dekker, J. *et al.* The 4D nucleome project. *Nature* **549**, 219-226, doi:10.1038/nature23884  
541 (2017).
- 542 2 Lieberman-Aiden, E. *et al.* Comprehensive mapping of long-range interactions reveals  
543 folding principles of the human genome. *Science* **326**, 289-293,  
544 doi:10.1126/science.1181369 (2009).

- 545 3 Dixon, J. R. *et al.* Topological domains in mammalian genomes identified by analysis of  
546 chromatin interactions. *Nature* **485**, 376-380, doi:10.1038/nature11082 (2012).
- 547 4 Nora, E. P. *et al.* Spatial partitioning of the regulatory landscape of the X-inactivation  
548 centre. *Nature* **485**, 381-385, doi:10.1038/nature11049 (2012).
- 549 5 Rao, S. S. *et al.* A 3D map of the human genome at kilobase resolution reveals principles  
550 of chromatin looping. *Cell* **159**, 1665-1680, doi:10.1016/j.cell.2014.11.021 (2014).
- 551 6 Sun, J. H. *et al.* Disease-Associated Short Tandem Repeats Co-localize with Chromatin  
552 Domain Boundaries. *Cell* **175**, 224-238 e215, doi:10.1016/j.cell.2018.08.005 (2018).
- 553 7 Lupianez, D. G. *et al.* Disruptions of topological chromatin domains cause pathogenic  
554 rewiring of gene-enhancer interactions. *Cell* **161**, 1012-1025,  
555 doi:10.1016/j.cell.2015.04.004 (2015).
- 556 8 Rao, S. S. P. *et al.* Cohesin Loss Eliminates All Loop Domains. *Cell* **171**, 305-320 e324,  
557 doi:10.1016/j.cell.2017.09.026 (2017).
- 558 9 Holmes, D. S., Mayfield, J. E., Sander, G. & Bonner, J. Chromosomal RNA: its properties.  
559 *Science* **177**, 72-74, doi:10.1126/science.177.4043.72 (1972).
- 560 10 Rodriguez-Campos, A. & Azorin, F. RNA is an integral component of chromatin that  
561 contributes to its structural organization. *PLoS One* **2**, e1182,  
562 doi:10.1371/journal.pone.0001182 (2007).
- 563 11 Hall, L. L. & Lawrence, J. B. RNA as a fundamental component of interphase  
564 chromosomes: could repeats prove key? *Curr Opin Genet Dev* **37**, 137-147,  
565 doi:10.1016/j.gde.2016.04.005 (2016).
- 566 12 Nozawa, R. S. & Gilbert, N. RNA: Nuclear Glue for Folding the Genome. *Trends Cell Biol*  
567 **29**, 201-211, doi:10.1016/j.tcb.2018.12.003 (2019).
- 568 13 Nozawa, R. S. *et al.* SAF-A Regulates Interphase Chromosome Structure through  
569 Oligomerization with Chromatin-Associated RNAs. *Cell* **169**, 1214-1227 e1218,  
570 doi:10.1016/j.cell.2017.05.029 (2017).
- 571 14 Pederson, T. Half a century of locating DNA and RNA in cells. *FASEB J* **33**, 8693-8694,  
572 doi:10.1096/fj.190801ufm (2019).
- 573 15 Li, X. *et al.* GRID-seq reveals the global RNA-chromatin interactome. *Nat Biotechnol* **35**,  
574 940-950, doi:10.1038/nbt.3968 (2017).
- 575 16 Miao, Y. *et al.* Enhancer-associated long non-coding RNA LEENE regulates endothelial  
576 nitric oxide synthase and endothelial function. *Nat Commun* **9**, 292, doi:10.1038/s41467-  
577 017-02113-y (2018).
- 578 17 Place, R. F., Li, L. C., Pookot, D., Noonan, E. J. & Dahiya, R. MicroRNA-373 induces  
579 expression of genes with complementary promoter sequences. *Proc Natl Acad Sci U S A*  
580 **105**, 1608-1613, doi:10.1073/pnas.0707594105 (2008).
- 581 18 Morris, K. V., Chan, S. W., Jacobsen, S. E. & Looney, D. J. Small interfering RNA-induced  
582 transcriptional gene silencing in human cells. *Science* **305**, 1289-1292,  
583 doi:10.1126/science.1101372 (2004).
- 584 19 Penny, G. D., Kay, G. F., Sheardown, S. A., Rastan, S. & Brockdorff, N. Requirement for  
585 Xist in X chromosome inactivation. *Nature* **379**, 131-137, doi:10.1038/379131a0 (1996).
- 586 20 Yang, F. *et al.* The lncRNA Firre anchors the inactive X chromosome to the nucleolus by  
587 binding CTCF and maintains H3K27me3 methylation. *Genome Biol* **16**, 52,  
588 doi:10.1186/s13059-015-0618-0 (2015).
- 589 21 Calandrelli, R. *et al.* Stress-induced RNA-chromatin interactions promote endothelial  
590 dysfunction. *Nat Commun* **11**, 5211, doi:10.1038/s41467-020-18957-w (2020).
- 591 22 Watanabe, T. *et al.* Role for piRNAs and noncoding RNA in de novo DNA methylation of  
592 the imprinted mouse Rasgrf1 locus. *Science* **332**, 848-852, doi:10.1126/science.1203919  
593 (2011).

- 594 23 Rinn, J. L. *et al.* Functional demarcation of active and silent chromatin domains in human  
595 HOX loci by noncoding RNAs. *Cell* **129**, 1311-1323, doi:10.1016/j.cell.2007.05.022  
596 (2007).
- 597 24 Xiao, R. *et al.* Pervasive Chromatin-RNA Binding Protein Interactions Enable RNA-Based  
598 Regulation of Transcription. *Cell* **178**, 107-121 e118, doi:10.1016/j.cell.2019.06.001  
599 (2019).
- 600 25 Dumelie, J. G. & Jaffrey, S. R. Defining the location of promoter-associated R-loops at  
601 near-nucleotide resolution using bisDRIP-seq. *Elife* **6**, doi:10.7554/eLife.28306 (2017).
- 602 26 Yan, Z. *et al.* Genome-wide colocalization of RNA-DNA interactions and fusion RNA pairs.  
603 *Proc Natl Acad Sci U S A* **116**, 3328-3337, doi:10.1073/pnas.1819788116 (2019).
- 604 27 Yin, Y. *et al.* U1 snRNP regulates chromatin retention of noncoding RNAs. *Nature* **580**,  
605 147-150, doi:10.1038/s41586-020-2105-3 (2020).
- 606 28 Percharde, M. *et al.* A LINE1-Nucleolin Partnership Regulates Early Development and  
607 ESC Identity. *Cell* **174**, 391-405 e319, doi:10.1016/j.cell.2018.05.043 (2018).
- 608 29 Chen, W. *et al.* RNAs as Proximity-Labeling Media for Identifying Nuclear Speckle  
609 Positions Relative to the Genome. *iScience* **4**, 204-215, doi:10.1016/j.isci.2018.06.005  
610 (2018).
- 611 30 Quinodoz, S. A. *et al.* RNA promotes the formation of spatial compartments in the nucleus.  
612 *Cell* **184**, 5775-5790 e5730, doi:10.1016/j.cell.2021.10.014 (2021).
- 613 31 Chu, H. P. *et al.* TERRA RNA Antagonizes ATRX and Protects Telomeres. *Cell* **170**, 86-  
614 101 e116, doi:10.1016/j.cell.2017.06.017 (2017).
- 615 32 Yamazaki, T. *et al.* Functional Domains of NEAT1 Architectural lncRNA Induce  
616 Paraspeckle Assembly through Phase Separation. *Mol Cell* **70**, 1038-1053 e1037,  
617 doi:10.1016/j.molcel.2018.05.019 (2018).
- 618 33 Rinn, J. L. & Chang, H. Y. Genome regulation by long noncoding RNAs. *Annu Rev*  
619 *Biochem* **81**, 145-166, doi:10.1146/annurev-biochem-051410-092902 (2012).
- 620 34 Lee, J. T. Gracefully ageing at 50, X-chromosome inactivation becomes a paradigm for  
621 RNA and chromatin control. *Nat Rev Mol Cell Biol* **12**, 815-826, doi:10.1038/nrm3231  
622 (2011).
- 623 35 Sridhar, B. *et al.* Systematic Mapping of RNA-Chromatin Interactions In Vivo. *Curr Biol* **27**,  
624 602-609, doi:10.1016/j.cub.2017.01.011 (2017).
- 625 36 Wu, W. *et al.* Mapping RNA-chromatin interactions by sequencing with iMARGI. *Nat*  
626 *Protoc* **14**, 3243-3272, doi:10.1038/s41596-019-0229-4 (2019).
- 627 37 Bell, J. C. *et al.* Chromatin-associated RNA sequencing (ChAR-seq) maps genome-wide  
628 RNA-to-DNA contacts. *Elife* **7**, doi:10.7554/eLife.27024 (2018).
- 629 38 Bonetti, A. *et al.* RADICL-seq identifies general and cell type-specific principles of  
630 genome-wide RNA-chromatin interactions. *Nat Commun* **11**, 1018, doi:10.1038/s41467-  
631 020-14337-6 (2020).
- 632 39 Akgol Oksuz, B. *et al.* Systematic evaluation of chromosome conformation capture  
633 assays. *Nat Methods* **18**, 1046-1055, doi:10.1038/s41592-021-01248-7 (2021).
- 634 40 Mourad, R. & Cuvier, O. Predicting the spatial organization of chromosomes using  
635 epigenetic data. *Genome Biol* **16**, 182, doi:10.1186/s13059-015-0752-8 (2015).
- 636 41 Zhang, Y. *et al.* Transcriptionally active HERV-H retrotransposons demarcate  
637 topologically associating domains in human pluripotent stem cells. *Nat Genet* **51**, 1380-  
638 1388, doi:10.1038/s41588-019-0479-7 (2019).
- 639 42 Zhang, S. *et al.* RNA polymerase II is required for spatial chromatin reorganization  
640 following exit from mitosis. *Sci Adv* **7**, eabg8205, doi:10.1126/sciadv.abg8205 (2021).
- 641 43 Krietenstein, N. *et al.* Ultrastructural Details of Mammalian Chromosome Architecture. *Mol*  
642 *Cell* **78**, 554-565 e557, doi:10.1016/j.molcel.2020.03.003 (2020).

- 643 44 Genga, R. M. J. *et al.* Single-Cell RNA-Sequencing-Based CRISPRi Screening Resolves  
644 Molecular Drivers of Early Human Endoderm Development. *Cell Rep* **27**, 708-718 e710,  
645 doi:10.1016/j.celrep.2019.03.076 (2019).
- 646 45 Dekker, J., Rippe, K., Dekker, M. & Kleckner, N. Capturing chromosome conformation.  
647 *Science* **295**, 1306-1311, doi:10.1126/science.1067799 (2002).
- 648 46 Engreitz, J. M. *et al.* RNA-RNA interactions enable specific targeting of noncoding RNAs  
649 to nascent Pre-mRNAs and chromatin sites. *Cell* **159**, 188-199,  
650 doi:10.1016/j.cell.2014.08.018 (2014).
- 651 47 Rahl, P. B. *et al.* c-Myc regulates transcriptional pause release. *Cell* **141**, 432-445,  
652 doi:10.1016/j.cell.2010.03.030 (2010).
- 653 48 Chao, S. H. & Price, D. H. Flavopiridol inactivates P-TEFb and blocks most RNA  
654 polymerase II transcription in vivo. *J Biol Chem* **276**, 31793-31799,  
655 doi:10.1074/jbc.M102306200 (2001).
- 656 49 Barutcu, A. R., Blencowe, B. J. & Rinn, J. L. Differential contribution of steady-state RNA  
657 and active transcription in chromatin organization. *EMBO Rep* **20**, e48068,  
658 doi:10.15252/embr.201948068 (2019).
- 659 50 Jain, A. & Vale, R. D. RNA phase transitions in repeat expansion disorders. *Nature* **546**,  
660 243-247, doi:10.1038/nature22386 (2017).
- 661 51 Saha, S. & Hyman, A. A. RNA gets in phase. *J Cell Biol* **216**, 2235-2237,  
662 doi:10.1083/jcb.201706034 (2017).
- 663 52 Aumiller, W. M., Jr. & Keating, C. D. Phosphorylation-mediated RNA/peptide complex  
664 coacervation as a model for intracellular liquid organelles. *Nat Chem* **8**, 129-137,  
665 doi:10.1038/nchem.2414 (2016).
- 666 53 Brahma, S. & Henikoff, S. RNA Polymerase II, the BAF remodeler and transcription factors  
667 synergize to evict nucleosomes. *bioRxiv*, doi:10.1101/2023.01.22.525083 (2023).
- 668 54 Ilik, I. A. *et al.* SON and SRRM2 are essential for nuclear speckle formation. *Elife* **9**,  
669 doi:10.7554/eLife.60579 (2020).
- 670 55 Fu, X. D. & Maniatis, T. Factor required for mammalian spliceosome assembly is localized  
671 to discrete regions in the nucleus. *Nature* **343**, 437-441, doi:10.1038/343437a0 (1990).
- 672 56 Smith, K. P., Hall, L. L. & Lawrence, J. B. Nuclear hubs built on RNAs and clustered  
673 organization of the genome. *Curr Opin Cell Biol* **64**, 67-76, doi:10.1016/j.ceb.2020.02.015  
674 (2020).
- 675 57 Kim, J., Han, K. Y., Khanna, N., Ha, T. & Belmont, A. S. Nuclear speckle fusion via long-  
676 range directional motion regulates speckle morphology after transcriptional inhibition. *J*  
677 *Cell Sci* **132**, doi:10.1242/jcs.226563 (2019).
- 678 58 Sigova, A. A. *et al.* Transcription factor trapping by RNA in gene regulatory elements.  
679 *Science* **350**, 978-981, doi:10.1126/science.aad3346 (2015).
- 680 59 Henninger, J. E. *et al.* RNA-Mediated Feedback Control of Transcriptional Condensates.  
681 *Cell* **184**, 207-225 e224, doi:10.1016/j.cell.2020.11.030 (2021).
- 682 60 Durand, N. C. *et al.* Juicer Provides a One-Click System for Analyzing Loop-Resolution  
683 Hi-C Experiments. *Cell Syst* **3**, 95-98, doi:10.1016/j.cels.2016.07.002 (2016).
- 684 61 Subramanian, A. *et al.* Gene set enrichment analysis: a knowledge-based approach for  
685 interpreting genome-wide expression profiles. *Proc Natl Acad Sci U S A* **102**, 15545-  
686 15550, doi:10.1073/pnas.0506580102 (2005).
- 687 62 Gonzalez, F. *et al.* An iCRISPR platform for rapid, multiplexable, and inducible genome  
688 editing in human pluripotent stem cells. *Cell Stem Cell* **15**, 215-226,  
689 doi:10.1016/j.stem.2014.05.018 (2014).
- 690 63 Zufferey, M., Tavernari, D., Oricchio, E. & Ciriello, G. Comparison of computational  
691 methods for the identification of topologically associating domains. *Genome Biol* **19**, 217,  
692 doi:10.1186/s13059-018-1596-9 (2018).

693 64 Yesbolatova, A. *et al.* The auxin-inducible degron 2 technology provides sharp  
694 degradation control in yeast, mammalian cells, and mice. *Nat Commun* **11**, 5701,  
695 doi:10.1038/s41467-020-19532-z (2020).  
696

## Figure legends

Figure 1. Localized RNA-genome association. (a) iMARGI's contact matrix between the RNA of the JARID2 gene (rows, bin size = 10 kb) to the genomic sequence of chromosome 6 (columns, bin size = 500 kb). The RNA association level (RAL) of JARID2 RNA (RAL track), the truncated version of RAL showing the small values (trunc RAL track), and the cumulative RAL of all RNA (cRAL track) exhibit a correlation with the first principal component of Hi-C's contact matrix (PC1 track). (b) iMARGI's contact matrix, RAL, and truncated RAL of the PVT1 RNA on chromosome 6. (c) An RNA-DNA contact matrix in a 2M bp sequence on Chromosome 6. Each entry in this contact matrix represents the number of iMARGI read pairs with the RNA-end mapped to the corresponding row and the DNA-end mapped to the corresponding column. The box marks an identified RNA-association domain, an approximately 1 Mb region containing the ATXN1 gene. (d) Upset plot of the numbers of the detected RNA-association domains in H1, HFF, and K562. (e) Box plots of RNA-association domains' sizes (blue) corresponding to the widths of the detected rectangular blocks, and the lengths of caRNA-producing genomic sequences (red) for each RNA-association domain corresponding to the heights of the detected rectangular blocks in iMARGI's contact matrix.

Figure 2. TAD boundaries suppress cross-over RNA-DNA contacts. (a) The RNA association level (RAL, color-coded) of the RNA transcribed within each TAD (row) on this TAD (center block) and its equal-length flanking regions (x axis). Curve at the bottom: the average RAL of all TADs (rows). (b) Comparison of normalized RNA-DNA contact matrices in WT and KO cell lines. The arrowhead points to the HERV-H element in WT that is deleted in KO. KO-WT: The contrast of the KO and WT contact matrices where red indicates an increase of RNA-DNA contacts in KO. The increased RNA-DNA contacts in KO are enriched with cross-over contacts (in the box at the upper right corner). (c) The 2x2 contingency table for an association test based on the data in panel b. (d) The seven previously identified insertion sites (columns) are ranked by  $\Delta_{DI}$ , where a smaller  $\Delta_{DI}$  (on the right) indicates a smaller increase in the ability to insulate cross-over DNA-DNA contacts (a weaker putative boundary). The rows mark whether each insertion site is a "de\_novo boundary site" (Column 1), a "likely-de\_novo-boundary site" (Columns 1-3), or an "unlikely-de\_novo-boundary site" (Columns 4-7), based on the comparison of Hi-C data in KI and WT. A Chi-square test is performed on each insertion site (column) based on the iMARGI data in KI and WT. A smaller p-value (y axis) represents stronger evidence against the null hypothesis that there is no association between the RNA-DNA cross-over contacts and KI. \*: p-value < 1.0e-4. (e) Comparison of normalized RNA-DNA contact matrices in WT and KI cell lines at the de\_novo boundary site (arrowhead). KI-WT: The contrast of the KI and WT contact matrices where red indicates an increase of RNA-DNA contacts in KI. The increased RNA-DNA contacts in KI are enriched in the non-crossover contacts (in the boxes at the upper left and lower right corners). (f) The 2x2 contingency table for an association test based on the data in panel e. (g) Significance levels for the deletion site (panel b, c) and the de\_novo-boundary insertion site (panel e, f). \*: p-value < 0.05, \*\*: p-value < 1.0e-4.

Figure 3. RNA-related loop changes. (a) Transcription induction of a gene suppresses a loop straddling this gene. Genomic coordinates of the AAVS1 locus, the loop straddling the AAVS1 locus (AAVS1 loop), and a nearby loop with a similar size (Nearby Ctrl loop). (b) 3C products without doxycycline (Dox: -) and with transcription induction by doxycycline (Dox: +), based on primers against the AAVS1 loop (Lanes 3, 4), the Nearby Ctrl loop (Lanes 5, 6), and a size-matched control region without any Hi-C detected loop (Negative Ctrl, Lanes 7, 8). \*: Difference in 3C products between Dox- and Dox+. Lane 1: E-Gel™ 1 kb DNA Ladder. Lanes 2 and 9: E-Gel™ 50 bp DNA Ladder. (c) Upset plot of the loop numbers in the four conditions, control, NH4OAc, FL, and RNase (rows). (d) An example of loop changes. Hi-C contact matrix of every replicate (row). Arrows: a shared loop in FL and RNase that is absent in control and NH4OAc. (e-g) FL and RNase increase loop strengths. (e, f) Aggregate loop strength represented by P2LL (e) or ZscoreLL (f) (y axis) in each condition (column). Color bars: the loops detected in each condition (red) or their union (blue). (g) Box plots of the strengths of individual loops (P2M) in every condition (column). \*\*\*\*: p-value < 2.2e-16.

Figure 4. Between-anchor caRNA anticorrelates with chromatin looping. (a-b) The loops in the Control (control loops) are depleted with between-anchor caRNA. (a) The caRNA levels in the control (Control RAL) on loop anchors (two sides) and between the anchors (middle) is color-coded (blue: low, yellow: high) for every loop



detected in any condition (Union loops, rows). Loops are ranked by the relative level of their between-anchor caRNA (Inside-loop To Anchor (ITA) ratio) from low (top) to high (bottom). (b) The enrichment/depletion level (GSEA score, x axis) of the control loops in the subset of loops from the top-ranked loop (first row) and the currently ranked loop (current row, y axis). A positive/negative GSEA score indicates an enrichment/depletion of the control loops in this subset of loops. The control loops are enriched in the top-ranked loops, i.e., those with low levels of between-anchor caRNA (blue bar on the right), and are depleted in the bottom-ranked loops, i.e., those with high levels of between-anchor caRNA (yellow bar). (c-d) RNase emergent loops are those with low levels of between-anchor caRNA. (c) The caRNA levels in the RNase (RNase RAL) on loop anchors (two sides) and between the anchors (middle) is color-coded (blue: low, yellow: high) for every loop detected in any condition (Union loops, rows). The union loops (rows) are ordered by the relative level of their between-anchor caRNA (the ITA ratio calculated in RNase) from low (top) to high (bottom). (d) The enrichment level (GSEA score, x axis) of the RNase loops (x axis) in the subset of loops from the top-ranked loop (first row) and the currently ranked loop (current row, y axis). The RNase-specific loops are enriched in the top-ranked loops, i.e., the loops with low levels of between-anchor caRNA in RNase, as indicated by the increasing GSEA scores (blue bar on the right). In contrast, the loops detected in other conditions are enriched in the bottom-ranked loops, i.e., the loops with high levels of between-anchor caRNA in RNase, as indicated by the decreasing GSEA scores (yellow bar). (e-g) Transcriptional suppression of the ZMYND8 induces a specific chromatin loop. (e) Changes in iMARGI RNA-DNA contact maps in Control (left panel), FL (central panel), and RNase (right panel). FL reduced the caRNA in the upstream region of the ZMYND8 gene (blue dox) and induced a chromatin loop near the caRNA-depleted region (curve at the bottom). RNase reduced the caRNA from a wider genomic region and induced the same chromatin loop as that in FL. CBS: CTCF binding site. Arrowheads point to CBSs' directions. Blue dots: Hi-C derived loops that are superimposed on this iMARGI contact map. Arrow: the emergent loop in FL. (f) Comparison of normalized ZMYND8's expression levels (y axis) in CRISPRi experiments with the scrambled gRNA (Scramble Ctrl) and ZMYND8-targeting gRNA (ZMYND8 gRNA). (g) 3C products from the Negative Ctrl primers (the first 3 lanes), the primers for the To-be-tested loop (3 middle 3 lanes), and the Positive Ctrl primers (the last 3 lanes) in CRISPRi experiments without a gRNA (gRNA: None), with a scrambled gRNA control (gRNA: Scramble), or with the ZMYND8-targeting gRNA (gRNA: ZMYND8). The Negative Ctrl primers did not yield any product in any experiment (Lanes 3-5). The Positive Ctrl primers yielded products of the same sizes in all three experiments (Lanes 9-11). The primers for the to-be-tested loop yielded a product with ZMYND8-targeting gRNA (arrow) but not with a scrambled gRNA or without gRNA (Lanes 6-8), confirming that a loop is created by ZMYND8 CRISPRi. Lane 1: E-Gel™ 1 kb DNA Ladder. Lanes 2: E-Gel™ 50 bp DNA Ladder.

Figure 5. Enrichment of convergent CTCF binding sites (CBS) in the anchors of RNA-affected loops. (a) Comparison of loop strengths (P2LL, y axis) in the loops with convergent CBS, non-convergent CBS, and without CBS in the control and RNase (columns). \*\*\*\*: p-value < 1.6e-9. ns: not significant. (b) Enrichment of RNase emergent loops with between-anchor HERV-H caRNA in control (odds ratio, x axis). \*\*: p-value < 5.6e-5, Chi-square test. Odds ratio > 1 means enrichment. (c) Enrichment of "candidate HERV-H caRNA insulated loops" (CHRI-loops) with convergent CBS in their loop anchors as compared to control loops striding across HERV-H caRNA-attached genomic sequences (first row), the other control loops not striding across HERV-H caRNA-attached genomic sequences (second row), and the RNase emergent loops not striding across any HERV-H caRNA-attached genomic sequences (third row). \*: p < 6.8e-3, \*\*: p < 5.8e-6, \*\*\*: p < 4.1e-9. (d) The two target-crossing loops (rows) with increased Hi-C contacts in HERV-H KO (KO column) as compared to control (Control column). Hi-C data were denoised using the DeepLoop software. The denoised Hi-C contact maps were shown in the log scale. Arrow: direction of CTCF binding site in the loop anchor.

Figure 1

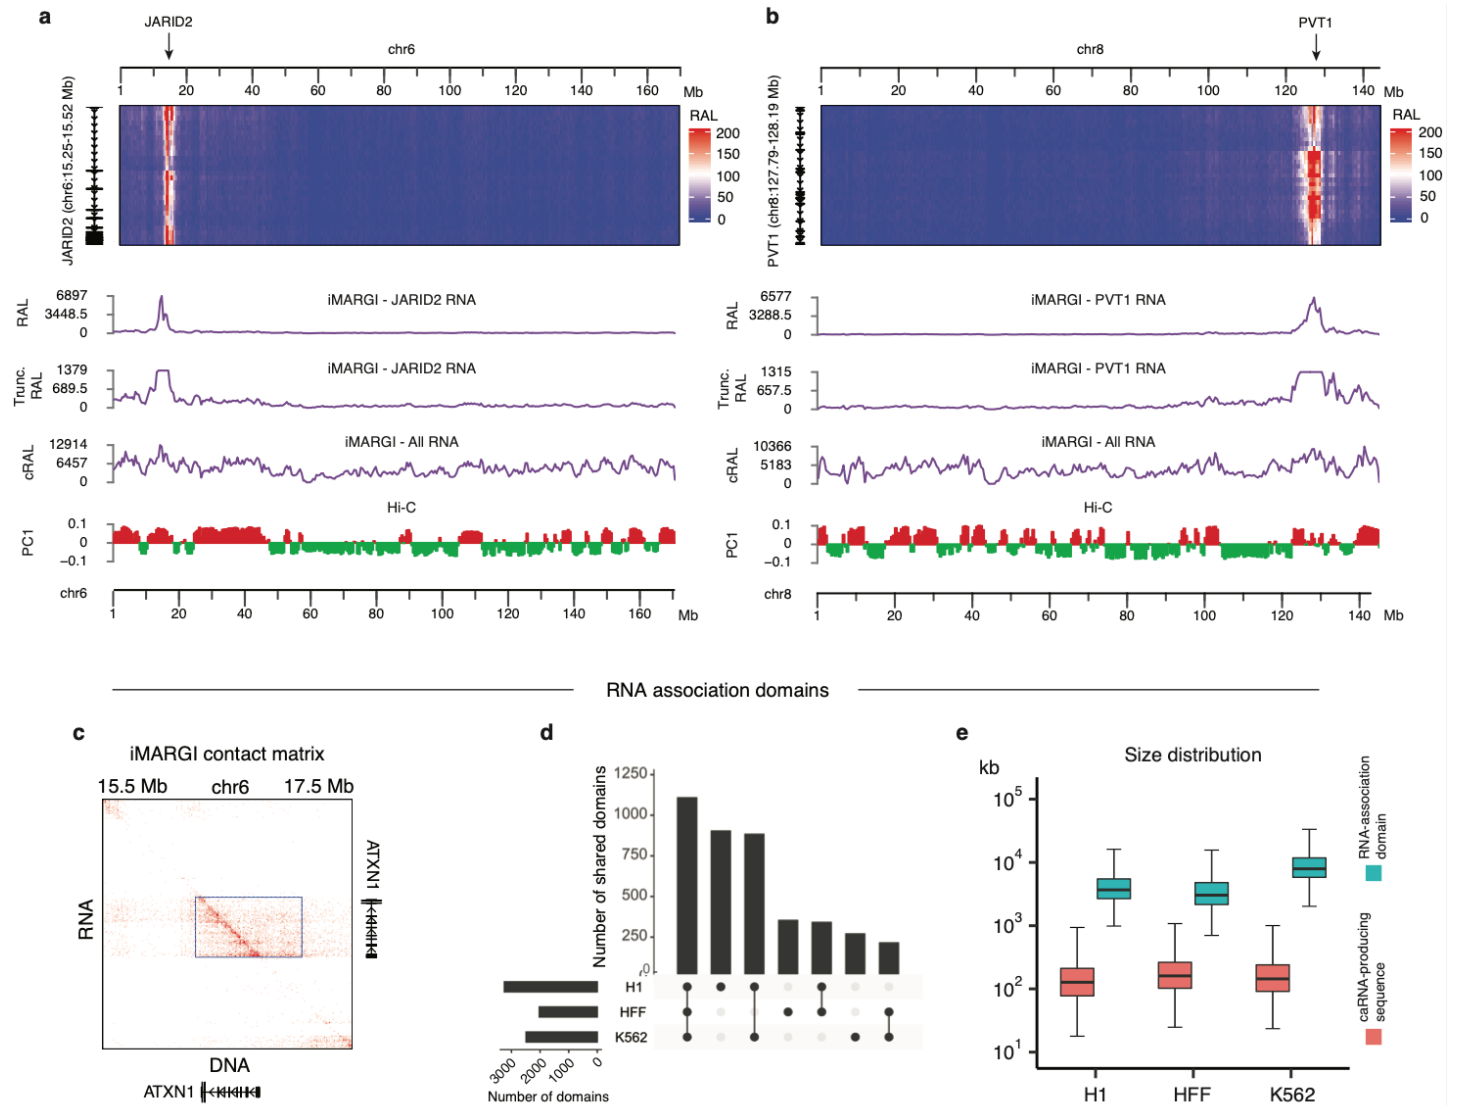

Figure 2

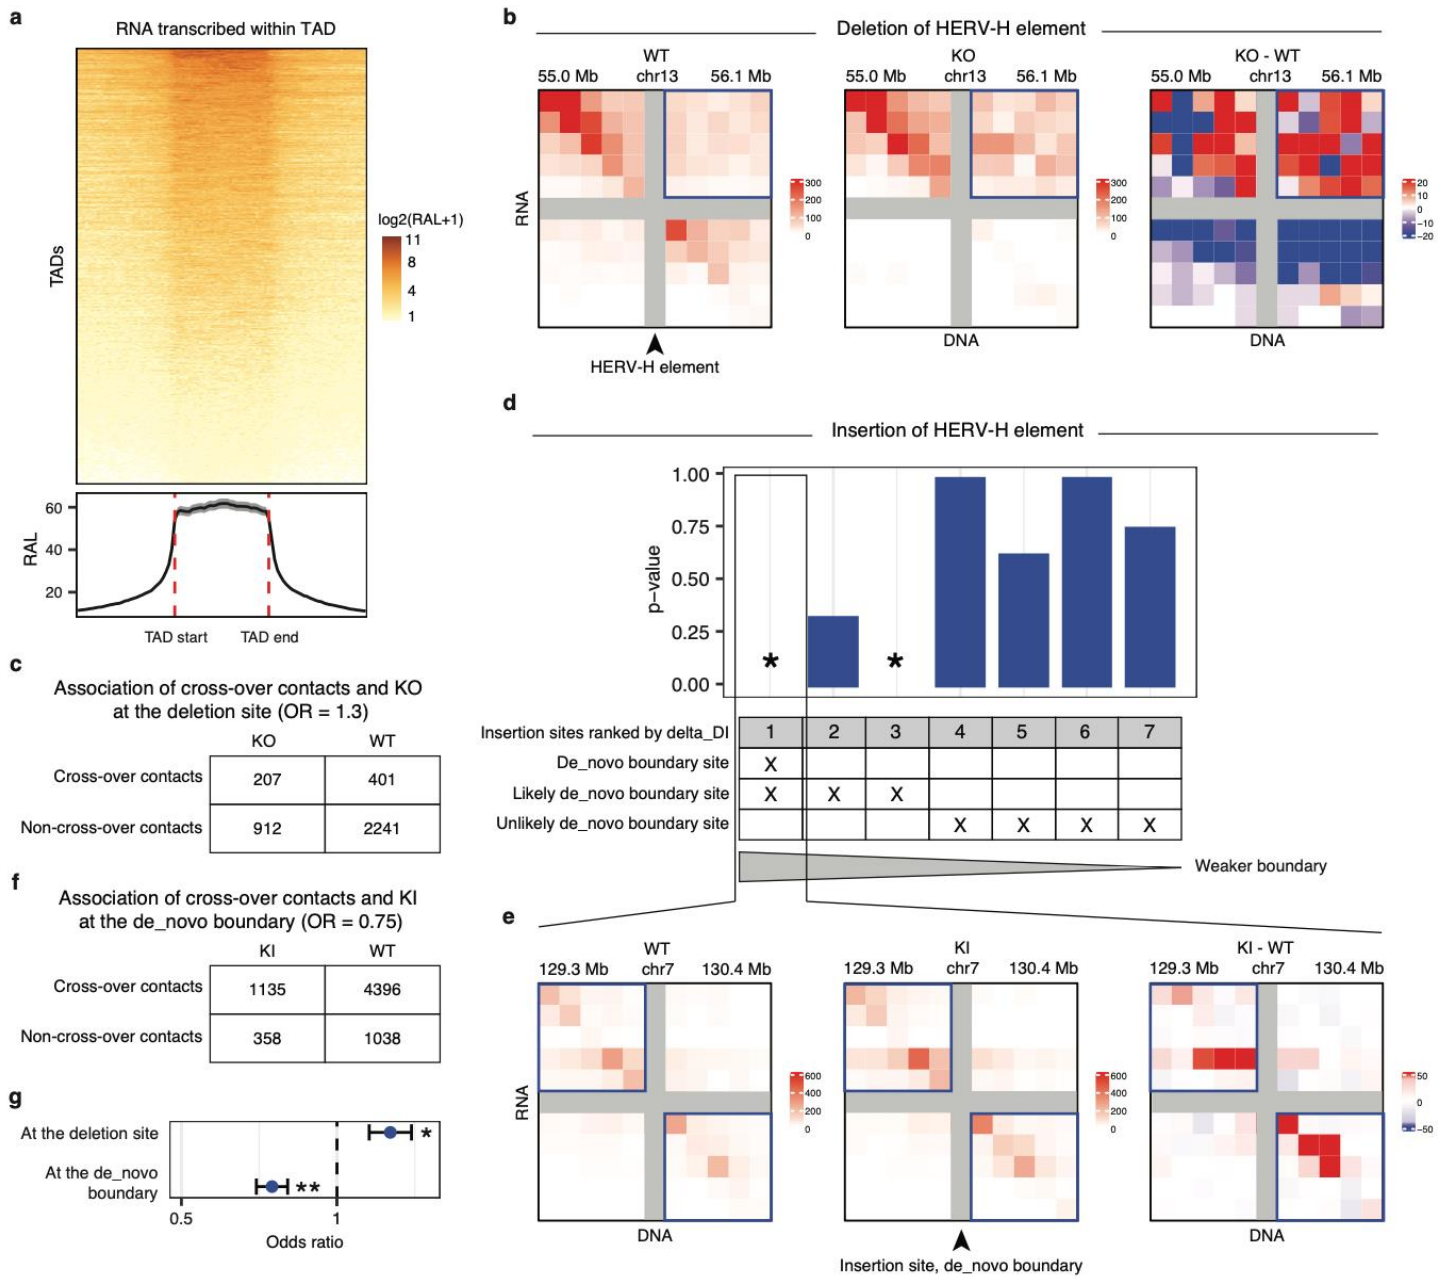

Figure 3

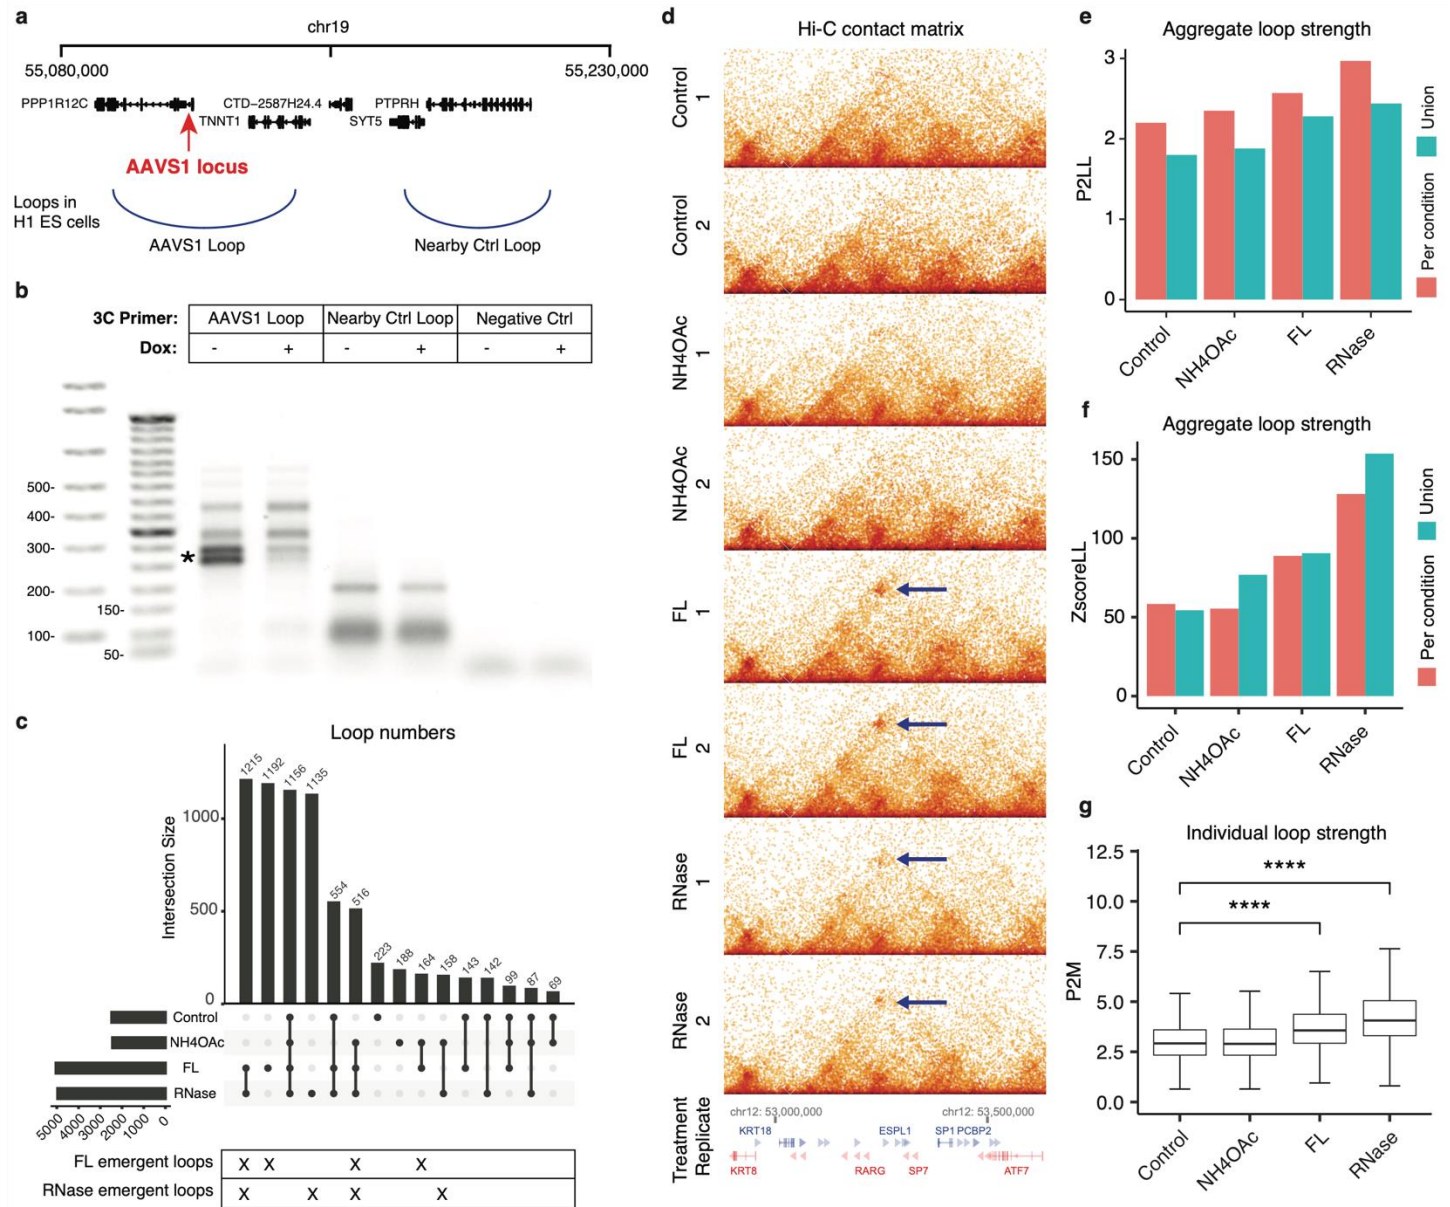

Figure 4

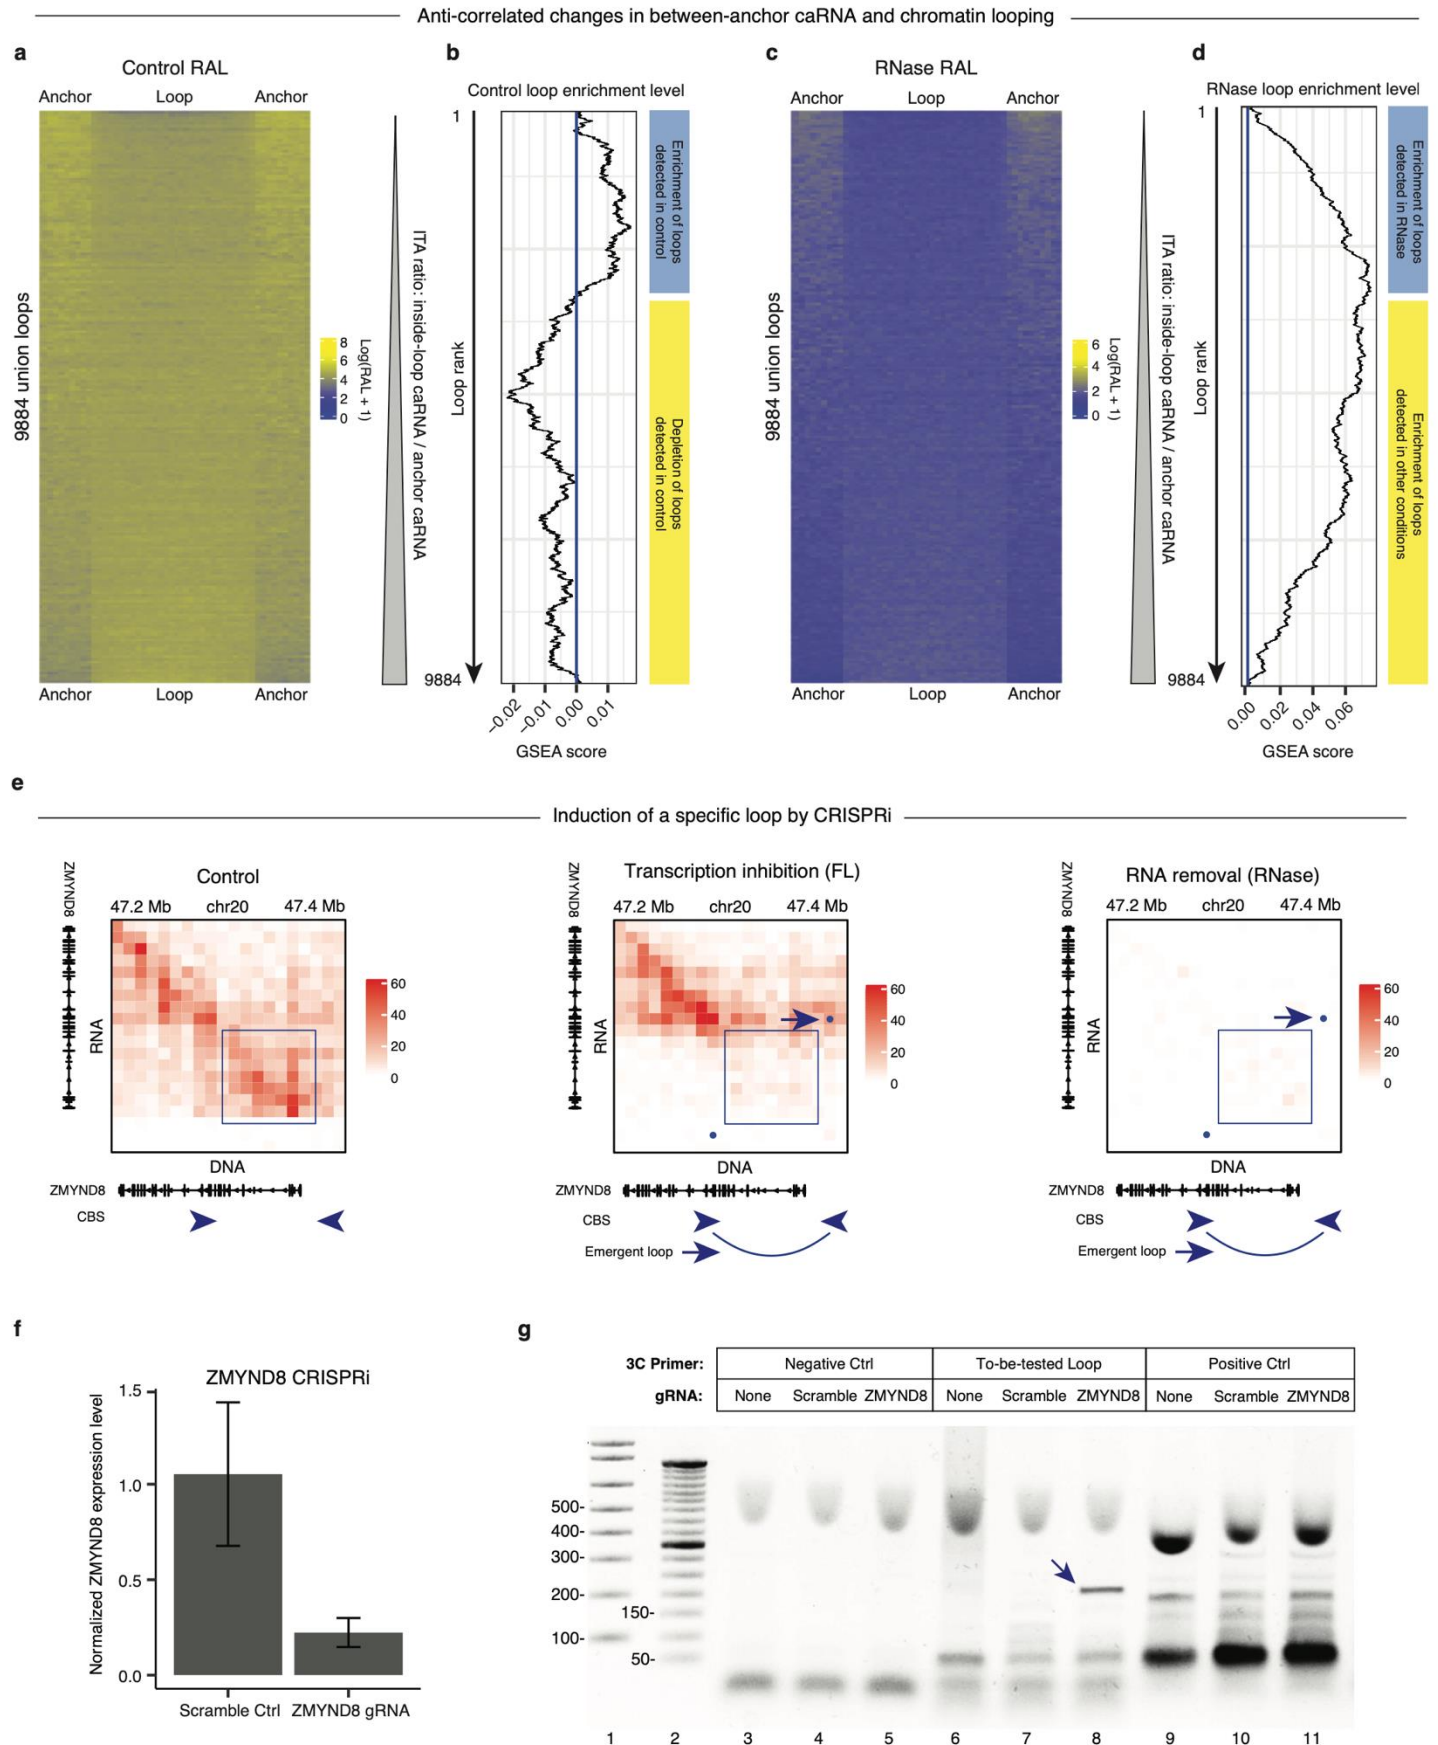

Figure 5

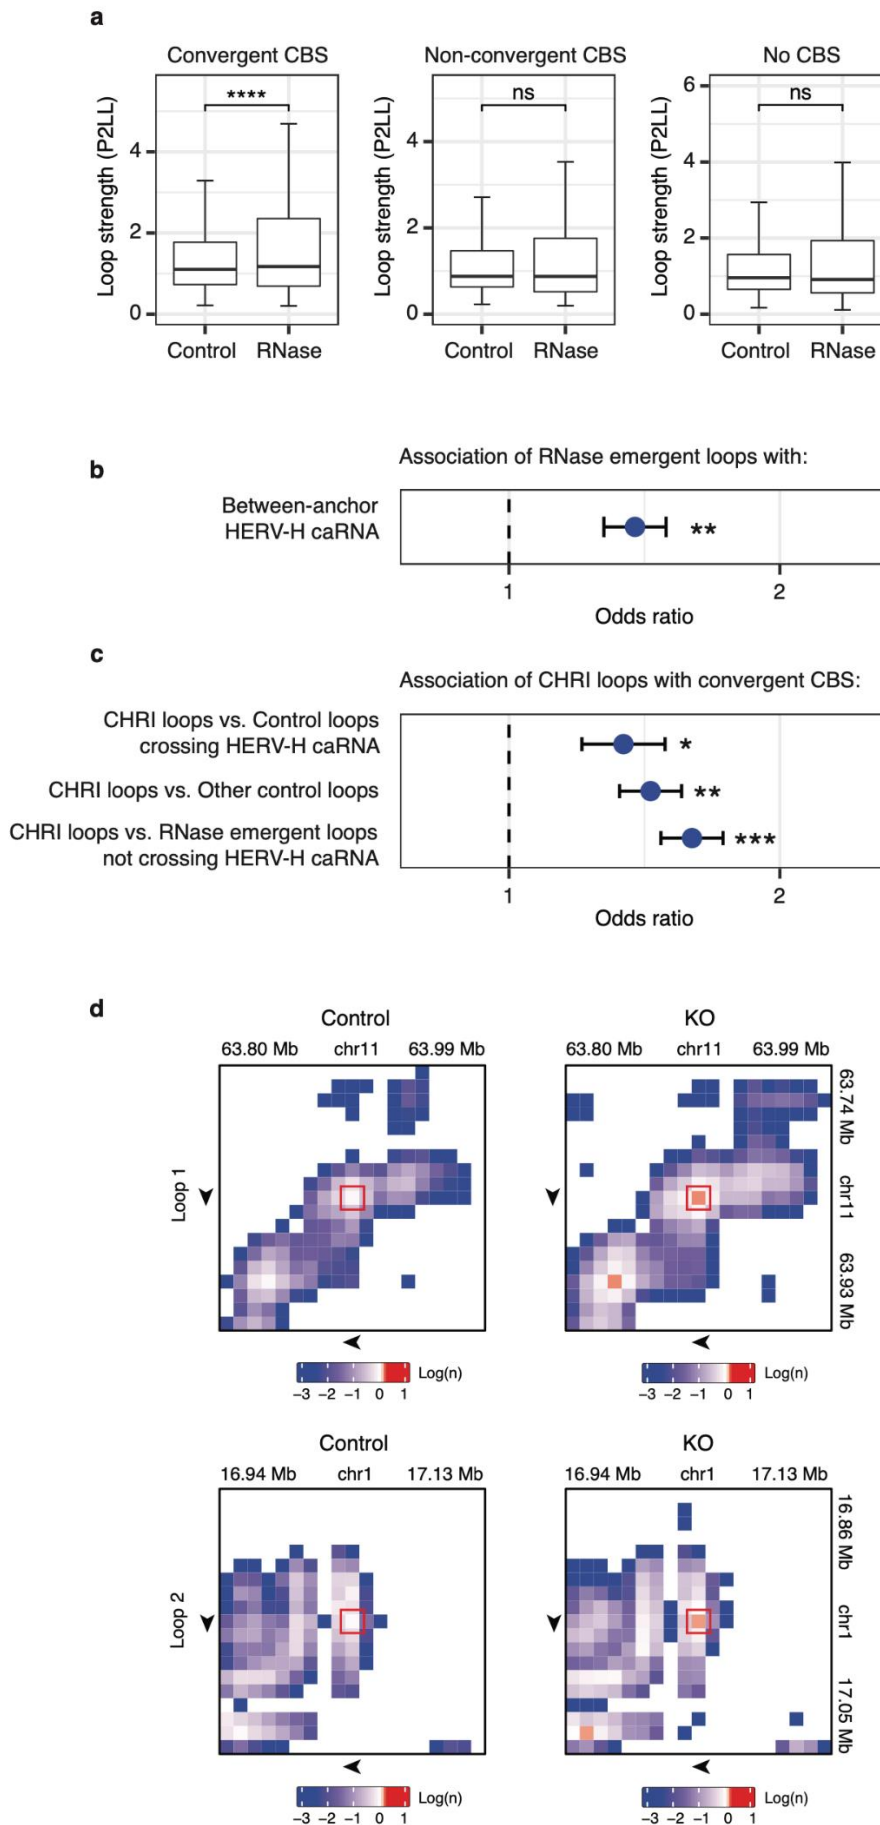

## Supplementary material

Supplementary Figure S1. Distribution of RNA attachment levels (RAL) on the genome. (a) RNA-DNA contact frequency (y axis) vs. the genomic distance between the mapped RNA-end and the DNA-end (x axis) in H1 (blue), HFF (green), and K562 cells (red). (b) The RAL of every TAD (row) and its equal-length flanking regions, based on all the RNAs transcribed from any genomic sequences outside of this TAD (row). The TAD lengths are normalized (center, x axis). Curve at the bottom: average RALs of all TADs. (c-e) Scatterplot of Hi-C's first eigenvector (PC1, y axis) and cRAL (x axis) on every 500 kb genomic bin (dot) of the entire genome in H1 (c), HFF (d), and K562 (e). SCC: Spearman correlation coefficient. (f-h) Scatterplot of gene density (y axis) and cRAL (x axis) on every 500 kb genomic bin (dot) of the entire genome in H1 (f), HFF (g), and K562 (h). The correlation between cRNA and gene density is weaker than the correlation between caRNA and Hi-C's PC1.

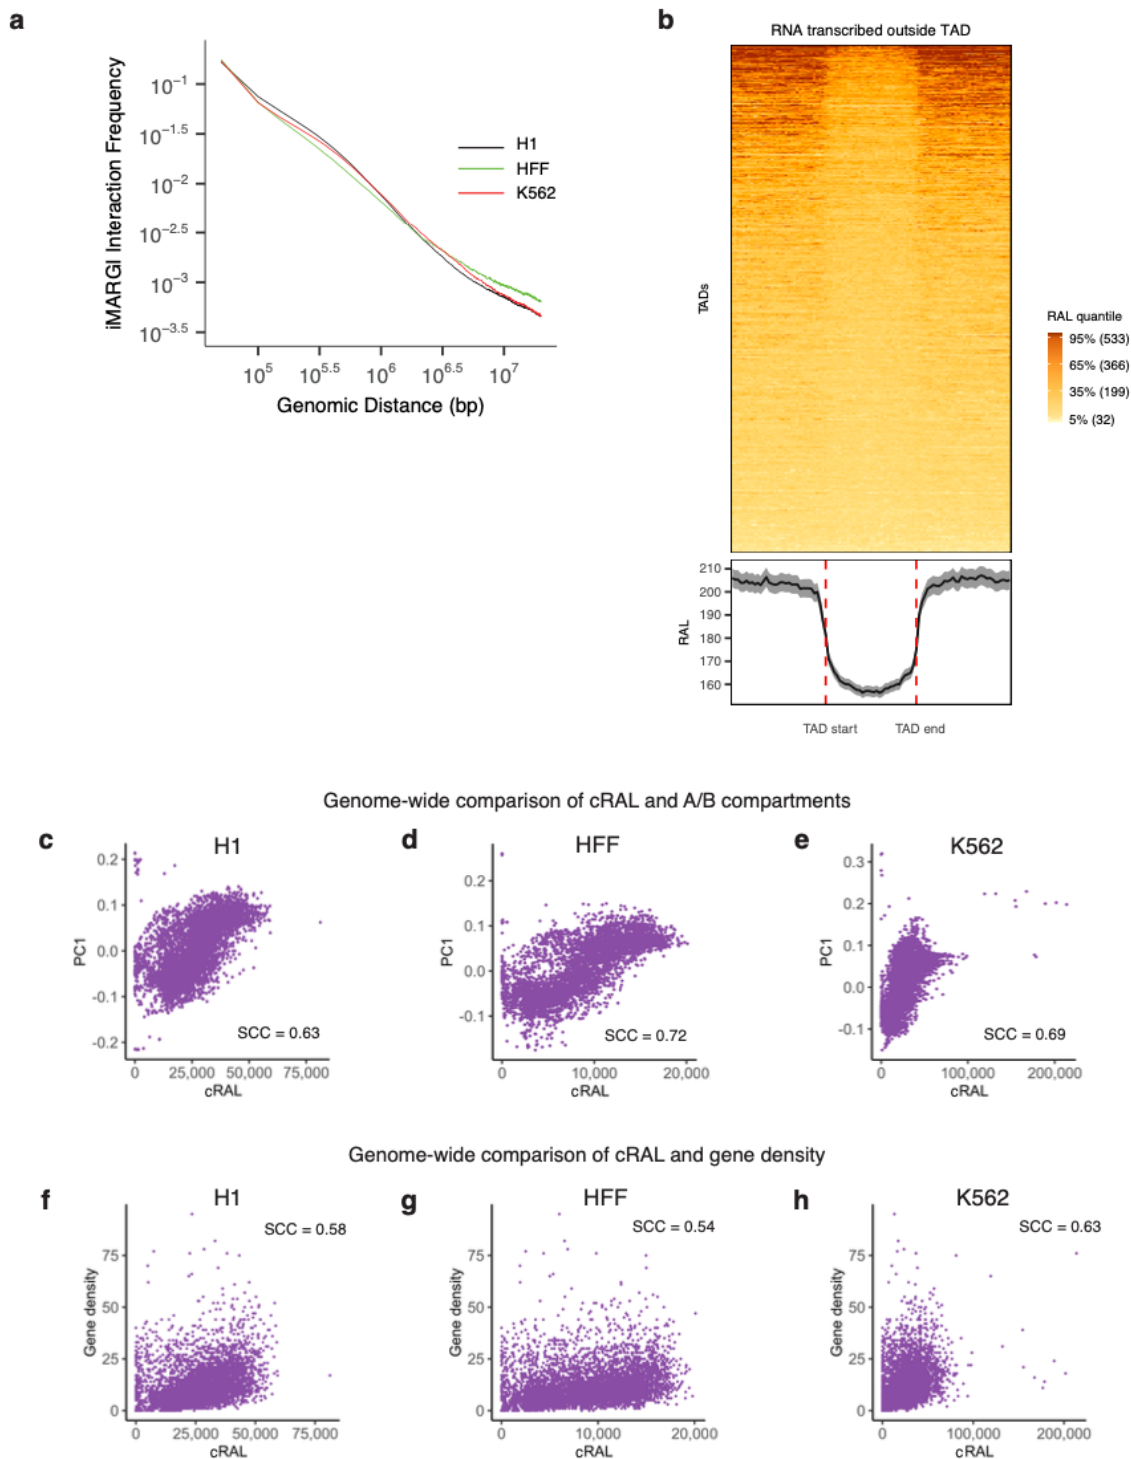

Supplementary Figure S2. Immunofluorescence analyses of SC35 and SON. (a-h) Immunostaining of SON (a-d) and SC35 (e-h) in control, NH<sub>4</sub>OAc, FL, and RNase-treated H1 cells. Scale bar = 6  $\mu$ m. (i-k) Distribution of SON's average number of foci per nucleus in control and each treatment (first row). \*: p-value < 0.05. \*\*: p-value < 0.01. In comparison, SON's mean background fluorescence (last row) does not change between control (pink) and each treatment (green). ns: not significant. (l-n) Distribution of SC35's average number of foci per nucleus in control and each treatment (first row). \*\*: p-value < 0.01. \*\*\*: p-value < 1.0e-3. In comparison, SC35's mean background fluorescence (last row) does not change between control (pink) and each treatment (green). ns: not significant.



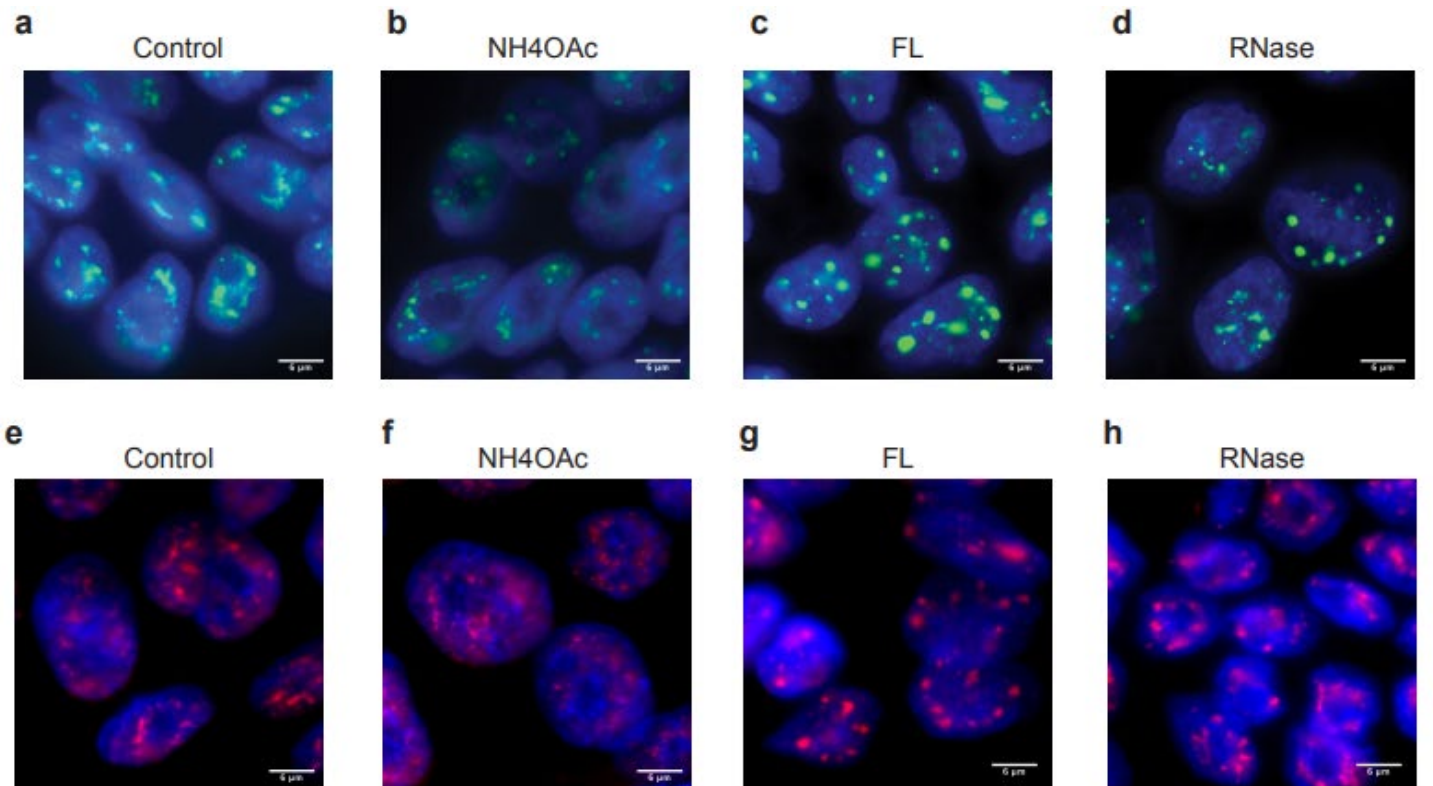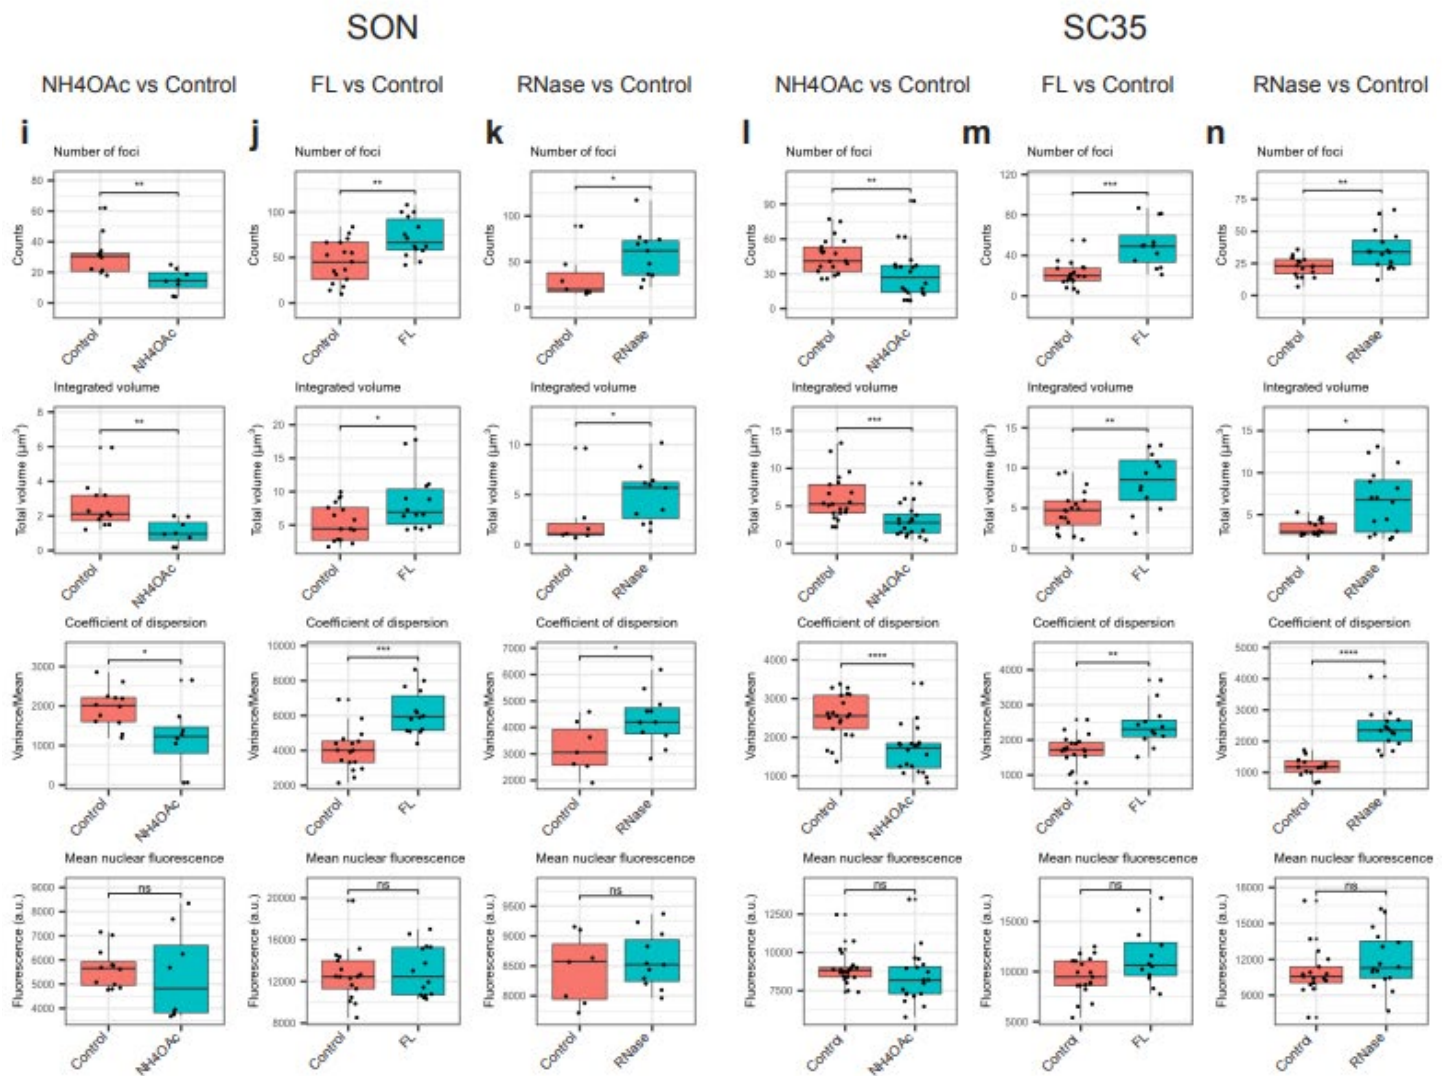

Supplementary Figure S3. An example of loop change. iMARGI contract matrix of control (a), NH<sub>4</sub>OAc (b), FL (c), and RNase (d) for the corresponding genomic region of Figure 3d. Blue dots: Hi-C derived loops that are superimposed on the iMARGI contact maps. Arrows: a shared loop in FL and RNase that is absent in control and NH<sub>4</sub>OAc.

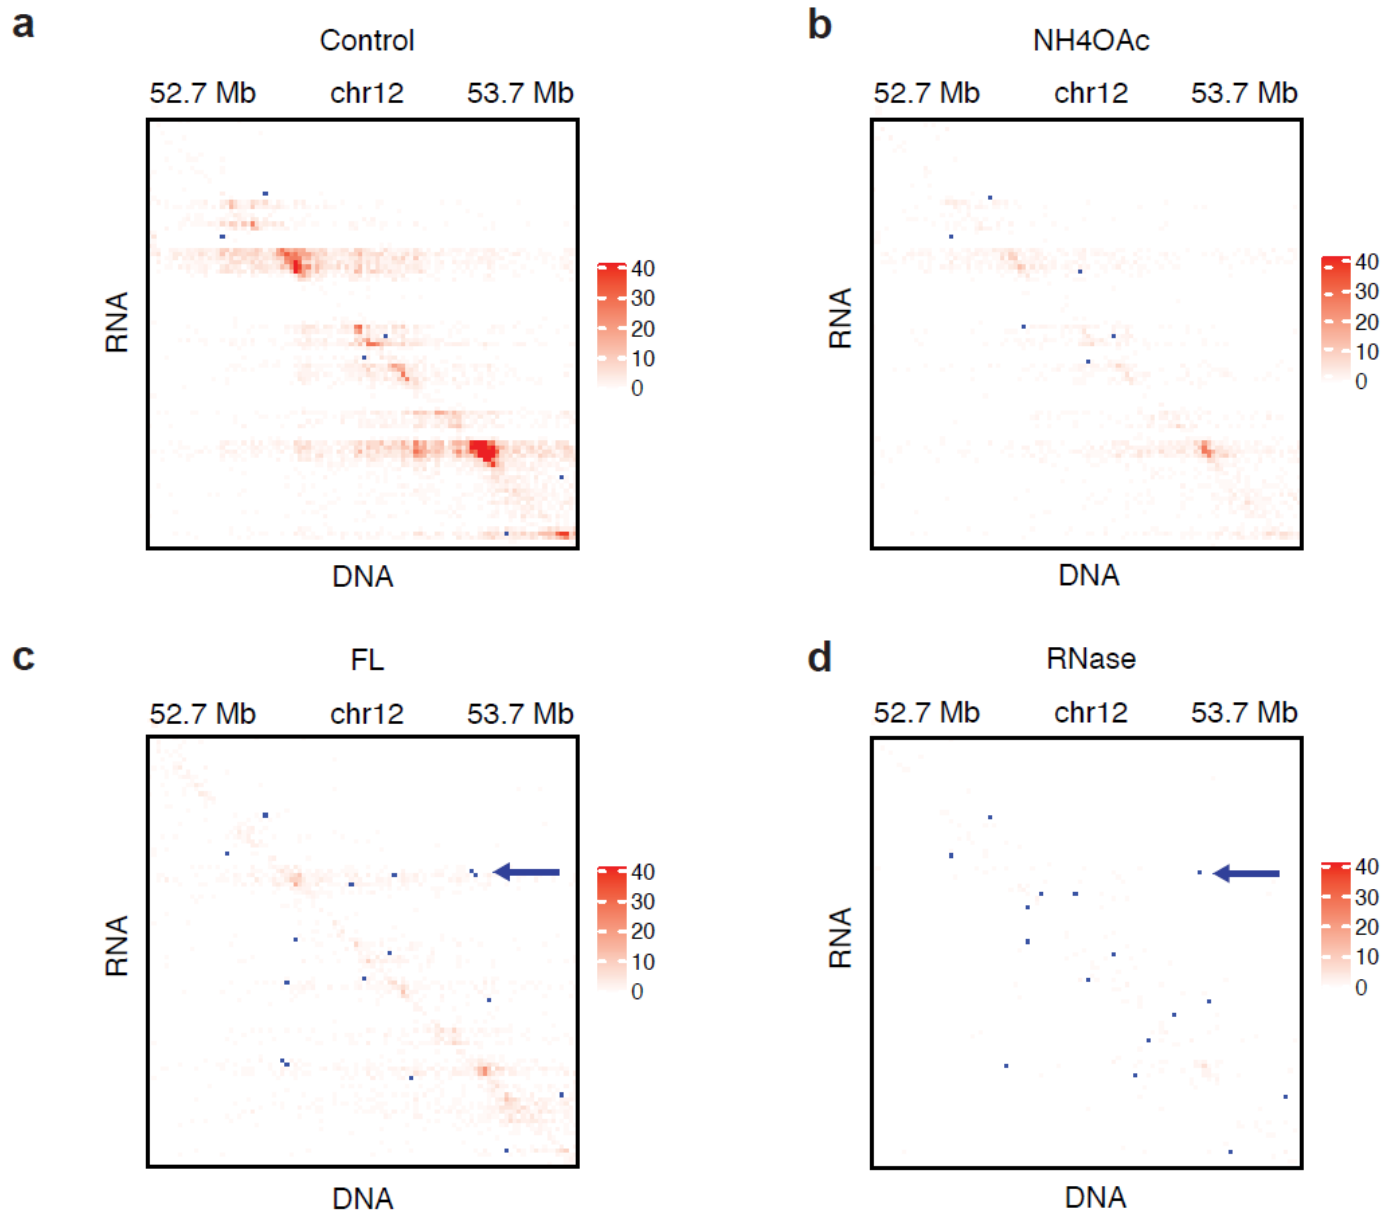

Supplementary Figure S4. RNA-association domains. (a-c) Scatter plots of each RNA-association domain's size (x axis) and the length of the longest gene in each RNA-association domain (y axis). Each dot represents an RNA-association domain, corresponding to a detected rectangular block from iMARGI's contact matrix. The width and the height of each rectangular block correspond to the size of an RNA-association domain and the length of the genomic sequence that produced the caRNA in this domain. The height of each rectangular block often matches the length of the longest gene overlapping with this RNA-association domain, suggesting that most RNA-association domains are decorated by the RNA of single genes. (d) Upset plot of the numbers of RNA-association domains in untreated H1 (Control) and H1 treated with NH<sub>4</sub>OAc, FL, and RNase. (e) Distributions of the heights of the detected blocks, \*: p-value < 1e-25, \*\*\*: p-value < 1e-75, \*\*\*\*: p-value < 1e-100. (f) Distributions of the widths of the detected blocks. \*: p-value < 1e-50, \*\*\*: p-value < 1e-180.

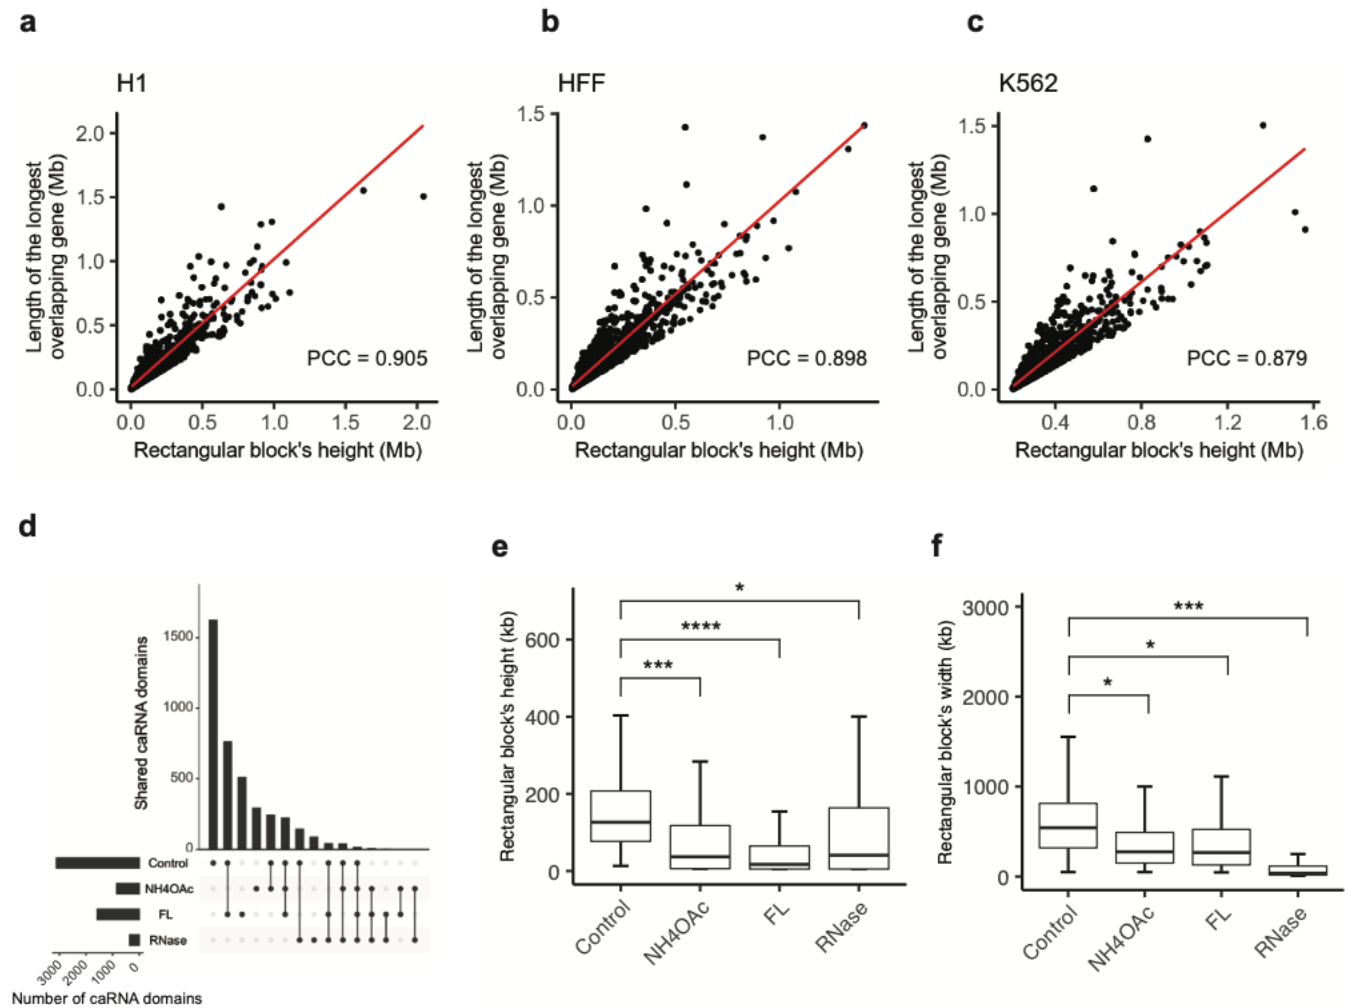

Table S1. Summary of iMARGI and Hi-C datasets.

| <b>a. iMARGI datasets</b>                     |                              |                      |                       |              |
|-----------------------------------------------|------------------------------|----------------------|-----------------------|--------------|
| Cell line                                     | Treatment                    | Number of replicates | Total # of read pairs | Source       |
| H1                                            | None                         | 4                    | 2,642,778,166         | This work    |
|                                               | NH4OAc                       | 2                    | 1,247,204,613         |              |
|                                               | FL                           | 2                    | 1,438,312,761         |              |
|                                               | RNase                        | 2                    | 1,670,230,715         |              |
| HFF                                           | None                         | 2                    | 2,755,576,893         |              |
| K562                                          | None                         | 2                    | 1,293,950,206         |              |
| <b>b. Hi-C datasets</b>                       |                              |                      |                       |              |
| Cell line                                     | Treatment                    | Number of replicates | Total # of read pairs | Source       |
| H1                                            | None                         | 2                    | 616,625,628           | This work    |
|                                               | NH4OAc                       | 2                    | 613,098,350           |              |
|                                               | FL                           | 2                    | 604,503,572           |              |
|                                               | RNase                        | 2                    | 654,798,738           |              |
| HFF                                           | None                         | 2                    | 2,764,855,452         | 4DNESNMAAN97 |
| K562                                          | None                         | 6                    | 907,136,828           | 4DNESI7DEJTM |
| <b>c. iMARGI datasets in engineered cells</b> |                              |                      |                       |              |
| Cell line                                     | Treatment                    | Number of replicates | Total # of read pairs | Source       |
| H9 MLC2v:H2B                                  | None                         | 1                    | 692,140,673           | This work    |
| H9 MLC2v:H2B<br>HERV2-KO                      | None                         | 1                    | 566,783,631           |              |
| H9 MLC2v:H2B<br>HERV2-ins-clone2              | None                         | 1                    | 967,136,454           |              |
| <b>d. Hi-C datasets in engineered cells</b>   |                              |                      |                       |              |
| Cell line                                     | Treatment                    | Number of replicates | Total # of read pairs | Source       |
| HCT116 RPB1-<br>Dox-OsTIR1-<br>mClover-mAID   | Doxycycline<br>(control)     | 1                    | 632,233,849           | This work    |
|                                               | Doxycycline and 5-<br>Ph-IAA | 1                    | 716,607,191           |              |
| H9 MLC2v:H2B                                  | None                         | 2                    | 552,532,207           | GSE116862    |
| H9 MLC2v:H2B<br>HERV2-KO                      | None                         | 2                    | 635,909,624           |              |

## Online methods

**Cell culture and treatments.** Human embryonic stem cells (H1), hTert-immortalized human foreskin fibroblasts (HFF), and chronic myelogenous leukemia lymphoblasts (K562) were obtained from the 4D Nucleome (4DN) Cell Repository and cultured following the 4DN Consortium's approved culture protocol for each cell line (<https://www.4dnucleome.org/cell-lines.html>). The cell lines in the 4DN Cell Repository were established by the 4DN Consortium in collaboration with WiCell and ATCC for providing quality-controlled cells from the identical batch to minimize cell source and culture condition variations. The cell culture protocols were developed by the 4DN Cell Line Working Group and approved by the 4DN Steering Committee.

**Ammonium acetate treatment.** H1 cells were treated with 0.1 M NH<sub>4</sub>OAc in complete mTeSR medium for 10 min as described in a previous study<sup>1</sup>. Briefly, a crystalline NH<sub>4</sub>OAc (Sigma-Aldrich, Cat# A1542-500G) was dissolved in nuclease-free water and further diluted in cell medium. Aspirate medium in each well and H1 cells were treated with 0.1 M NH<sub>4</sub>OAc in medium for 10 min at RT.

**Flavopiridol treatment.** H1 cells were treated with 1 μM flavopiridol in complete mTeSR medium for 1h in an incubator as described previously<sup>2</sup>. Specifically, a crystalline flavopiridol (hydrochloride) (Cayman Chemical, item# 10009197) was dissolved in DMSO to prepare 1mM flavopiridol (FL) stock solution. 1mM FL stock solution was further diluted with complete mTeSR medium. Aspirate cell medium in each well and H1 cells were either treated with 1 μM FL in medium or an equivalent amount of DMSO in the medium in an incubator at 37°C for 1h.

**RNase A treatment.** H1 cells were harvested from cell culture plate and aliquoted cell suspension to 10 million H1 cells per 1.5 mL tube. Wash the cells with 1 mL 1X PBS and centrifuge at 500 X g for 3 min at RT. Then, cells were gently permeabilized by resuspending cell pellets with 0.01% PBST (TritonX-100 in PBS) and treated for 5 min at RT. After permeabilization, cells were treated with 200 μg/mL RNase A as described previously<sup>3</sup> (Thermo Fisher Scientific, Cat# EN0531) on rotator for 10 min at RT. The treated cells were fixed with 4% formaldehyde (Thermo Fisher Scientific, Cat# 28906) for immunofluorescence imaging. For Hi-C and iMARGI library generation, the treated cells were fixed with 1 mL 1% formaldehyde on rotator for 10 min at RT. Then, the reactions were terminated with 250 μL 1M glycine on rotator for 10 min at RT. The treated sample was centrifuged at 2000Xg for 5 min at 4°C and washed with 1 mL cold 1X PBS.

**dCas9-KRAB inducible cells.** The doxycycline-inducible dCas9-KRAB H1 ES cell line is generated and karyotyped by the 4D Nucleome Consortium (Danwei Huangfu Laboratory) (<https://4dnucleome.org>), with TRE-dCas9-KRAB and CAGGS-M2rtTA targeted into the AAVS1 locus.

**HERV-H deletion and insertion cells.** The control H9 human ES cells (H9 MLC2v:H2B), HERV-H deletion cell line (H9 MLC2v:H2B HERV2-KO), and HERV-H insertion cell line (H9 MLC2v:H2B HERV2-ins-clone2) were generated by Bing Ren lab and described in reference<sup>4</sup>.

**RPB1 The auxin-inducible degron 2 cells.** The RPB1 auxin-inducible degron 2 cells (HCT116 RPB1-Dox-OsTIR1-mClover-mAID) were generated by Masato Kanemaki lab and described in reference<sup>5</sup>.

**Calling *de novo* TAD boundaries.** TAD boundaries in WT (H9 MLC2v:H2B) and KI (H9 MLC2v:H2B HERV2-ins-clone2) were separately called based on their respective Hi-C data using The Arrowhead tool in the Juicer Tools<sup>6</sup> with default parameters. A TAD boundary called in KI but not in WT is regarded as a *de novo* TAD boundary.

**Immunofluorescence imaging.** The cells on coverslip (Fisher Scientific, Cat# 12-541A) were fixed with 4% formaldehyde at RT for 30 min. The fixed cells were washed with 1X PBS once and permeabilized with 0.1% TritonX-100 in PBS (PBST) at RT for 15 min on shaker. Afterwards, cells were blocked with 5% BSA (VWR, Cat# 97061-420) in PBST at RT for 30 min with gentle shaking. For SC35 staining, H1 cells were incubated with 1 mL diluted mouse monoclonal anti-SC35 primary antibody (1:250) (Abcam, Cat# ab11826) in 5% BSA at 37°C for 1h, and subsequently washed three times with PBST on shaker for 10 min. Cells were further incubated with 1 mL diluted goat anti-mouse secondary antibody with Alexa Fluor 568 (1:500 dilution) (Invitrogen, Cat# A-11004) in 5% BSA at 37°C for 30 min. For SON staining, the cells were incubated with 1 mL diluted rabbit anti-SON primary antibody (1:2000 dilution) (Atlas Antibodies, HPA023535) in 5% BSA at 37°C for 1h, and subsequently washed three times with PBST on shaker for 10 min. The cells were incubated with 1 mL diluted goat anti-rabbit secondary antibody with Alexa Fluor 488 (1:500 dilution) (Invitrogen, Cat# A-11008) in 5% BSA at 37 in 5% BSA at 37°C for 30 min. After staining, the cells were washed three times with PBST on shaker for 10 min. The cells on coverslips were mounted on slides (Fisher Scientific, Cat# 12-544-2) with 10  $\mu$ L ProLong antifade glass mountant with NucBlue stain (Thermo Fisher Scientific, Cat# P36981), placed in dark room for air-dry overnight. Images in the size of 512 $\times$ 512 pixels were acquired on Applied Precision OMX Super Resolution Microscope using a 100X/1.518 oil objective (GE Healthcare Life Sciences) (pixel size = 0.079  $\mu$ m). Z-stack images were acquired with thickness of 0.3  $\mu$ m sample thickness.

**Identification of nuclear speckle foci.** Nuclear speckle foci were identified by a previously described method<sup>2</sup>. Briefly, the nuclei were manually segmented and the mean fluorescence intensity in nuclei were measured with FIJI. The nuclear speckle foci were identified by FIJI 3D Object Counter plugin, with an appropriate intensity threshold of the mean fluorescence intensity in the cell nuclei and a size cut-off of more than 50 adjoining pixels (pixel size, 79 nm X 79 nm).

**In situ Hi-C library generation and data processing.** The Hi-C libraries were generated with the Arima-HiC kit (Arima Genomics, material# A510008, Document# A160134 v00) following the manufacturer's instructions. Hi-C data was processed following 4DN consortium's Hi-C data processing protocol (<https://www.4dnucleome.org/protocols.html>). Briefly, the Hi-C data were processed using the 4D Nucleome (4DN)'s Hi-C Processing Pipeline (v0.2.5) ([https://data.4dnucleome.org/resources/data-analysis/hi\\_c-processing-pipeline](https://data.4dnucleome.org/resources/data-analysis/hi_c-processing-pipeline)), with MAPQ > 30 to filter out multiple mappings.

The output .pairs files were provided to Cooler<sup>7</sup> (v0.8.10) and Juicer Tools<sup>6</sup> (v1.22.01) to generate .mcool and .hic files. The .mcool file was used in HiGlass<sup>8</sup> for visualization. The .hic files were inputted in Juicer Tools for A/B compartment, TAD, and loop analyses. A/B compartments were called by Juicer's "Eigenvector" tool based on KR normalized observed/expected (O/E) contacts at 500 kb resolution. TADs were called by Juicer's "Arrowhead" tool based on KR-normalized contacts at 10 kb resolution. Loops were called by Juicer's "CPU HiCCUPS" tool based on KR-normalized contacts simultaneously at 5 kb and 10 kb resolutions. Except for the resolution parameter, all the other parameters were left as the default.

TAD boundaries were extracted as the genomic regions between TADs in each sample. TAD boundary insulation score was calculated according to the definition in Crane et. al, 2015<sup>9</sup>.

Unique loops and overlapping loops were determined as follows. First, the Juicer called loops from each condition were merged into "unique loops" by taking the union. Then the unique loops in the union were reassigned to each condition by the following rule: a unique loop  $i$  (in the union) with anchor size  $s$  (either 5 or 10 kb) was re-assigned to a sample  $j$  if both anchors of loop  $i$  were within  $\pm s$  flanking regions of a loop in sample  $j$ . Aggregate Peak Analysis was performed using the Juicer's "APA" tool with default parameters. Metrics to define the loop strength such as Peak

to Lower Left (P2LL), Z-score Lower Left (ZscoreLL), and Peak to Mean (P2M) were calculated as defined in Juicer's APA<sup>6</sup>. The control loop straddling the AAVS1 locus was detected from H1-hESC Micro-C data<sup>10</sup>. To select RNase emergent loops that stride across HERV-H caRNA-attached genomic sequences in Control, i.e., the candidate HERV-H caRNA insulated loops (CHRI-loops), we used a threshold of at least 2 iMARGI read pairs with their RNA ends overlapping with HERV-H and their DNA ends mapped to the between-loop-anchor sequence. To check if deleting a copy of the HERV-H repeats led to increase of loop strengths of CHRI-loops, we used a threshold of 0.05 for the delta peak (KO peak - control peak), where peak is the normalized Hi-C read count at the loop's pixel, normalized by the total number of read pairs in each sample.

**Bias correction on Hi-C data for loop visualization.** H9 Control and HERV-H2 KO Hi-C data were subjected to HiCorr<sup>11</sup> with default parameters for bias correction and subsequently subjected to noise removal using the LoopDenoise function in DeepLoop<sup>12</sup>. All data processing was done with Hg19 per HiCorr and DeepLoop software's requirements.

**iMARGI library generation and data processing.** iMARGI libraries were generated and processed as previously described<sup>13</sup>. According to 4DN's approved iMARGI's data processing protocol<sup>13</sup>, any iMARGI read pair in which the RNA end and the DNA end mapped to within 1,000 bp of each other on the genome are removed from the data analysis. The RNA attachment level (RAL) of each genomic segment is the count of the DNA-ends mapped to this genomic segment<sup>14</sup>. Only the inter-chromosomal and the intra-chromosomal iMARGI read pairs that are separated by at least 200 kb apart were used for calculating RAL in any of the correlation analyses. Repeats of hg38 were downloaded from RepeatMasker (Smit, AFA, Hubley, R & Green, P. RepeatMasker Open-4.0). RAL of Alu-containing caRNA (Alu-caRNA) and LINE1-containing caRNA (L1-caRNA) were calculated as the count of the DNA ends mapped to each genomic segment (500 kb size) whose RNA ends mapped to a repeat segment of the Alu or LINE1 family respectively.

**RNA-defined domains.** Each rectangular block on iMARGI's contact matrix was identified as a peak of the iMARGI's read pairs' RNA ends (the height of this RNA peak) and a corresponding DNA peak of the DNA ends (the width of this RNA peak). Homer's findPeaks function was applied to the RNA ends of iMARGI' read pairs (peak size = 5,000 bp, minimum peak interval = 12,000 bp) to identify the peaks on the RNA ends (RNA peak). For each RNA peak, all the iMARGI's read pairs with their RNA ends inside this RNA peak were retrieved. The retrieved read pairs' DNA ends were subjected to Homer's findPeaks (peak size=25,000 bp, minimum peak interval=50,000 bp) to identify the peaks on the DNA ends (DNA peaks). If multiple DNA peaks were reported, the DNA peak with the highest read number was designated as the corresponding DNA peak.

**Genome coordinates.** All plotted genome coordinates are based on Hg38.

### References to online methods

- 1 Saha, S. & Hyman, A. A. RNA gets in phase. *J Cell Biol* **216**, 2235-2237, doi:10.1083/jcb.201706034 (2017).
- 2 Rahl, P. B. *et al.* c-Myc regulates transcriptional pause release. *Cell* **141**, 432-445, doi:10.1016/j.cell.2010.03.030 (2010).
- 3 Barutcu, A. R., Blencowe, B. J. & Rinn, J. L. Differential contribution of steady-state RNA and active transcription in chromatin organization. *EMBO Rep* **20**, e48068, doi:10.15252/embr.201948068 (2019).
- 4 Zhang, Y. *et al.* Transcriptionally active HERV-H retrotransposons demarcate topologically associating domains in human pluripotent stem cells. *Nat Genet* **51**, 1380-1388, doi:10.1038/s41588-019-0479-7 (2019).

- 5 Yesbolatova, A. *et al.* The auxin-inducible degron 2 technology provides sharp degradation control in yeast, mammalian cells, and mice. *Nat Commun* **11**, 5701, doi:10.1038/s41467-020-19532-z (2020).
- 6 Durand, N. C. *et al.* Juicer Provides a One-Click System for Analyzing Loop-Resolution Hi-C Experiments. *Cell Syst* **3**, 95-98, doi:10.1016/j.cels.2016.07.002 (2016).
- 7 Abdennur, N. & Mirny, L. A. Cooler: scalable storage for Hi-C data and other genomically labeled arrays. *Bioinformatics* **36**, 311-316, doi:10.1093/bioinformatics/btz540 (2020).
- 8 Kerpedjiev, P. *et al.* HiGlass: web-based visual exploration and analysis of genome interaction maps. *Genome Biol* **19**, 125, doi:10.1186/s13059-018-1486-1 (2018).
- 9 Crane, E. *et al.* Condensin-driven remodelling of X chromosome topology during dosage compensation. *Nature* **523**, 240-244, doi:10.1038/nature14450 (2015).
- 10 Krietenstein, N. *et al.* Ultrastructural Details of Mammalian Chromosome Architecture. *Mol Cell* **78**, 554-565 e557, doi:10.1016/j.molcel.2020.03.003 (2020).
- 11 Lu, L. *et al.* Robust Hi-C Maps of Enhancer-Promoter Interactions Reveal the Function of Non-coding Genome in Neural Development and Diseases. *Mol Cell* **79**, 521-534 e515, doi:10.1016/j.molcel.2020.06.007 (2020).
- 12 Zhang, S. *et al.* DeepLoop robustly maps chromatin interactions from sparse allele-resolved or single-cell Hi-C data at kilobase resolution. *Nat Genet* **54**, 1013-1025, doi:10.1038/s41588-022-01116-w (2022).
- 13 Wu, W. *et al.* Mapping RNA-chromatin interactions by sequencing with iMARGI. *Nat Protoc* **14**, 3243-3272, doi:10.1038/s41596-019-0229-4 (2019).
- 14 Sridhar, B. *et al.* Systematic Mapping of RNA-Chromatin Interactions In Vivo. *Curr Biol* **27**, 602-609, doi:10.1016/j.cub.2017.01.011 (2017).
